# Supplementary material for: Amino acid racemization in Neogloboquadrina pachyderma and Cibicidoides wuellerstorfi from the Arctic Ocean and its implications for age models
Source: Copernicus journal article supplement (doi:10.5194/gchron-5-285-2023), 2023-06-19
Supplement: Supplementary file 1 [file gchron-5-285-2023-supplement.pdf]

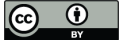

*Supplement of*

**Amino acid racemization in *Neogloboquadrina pachyderma* and *Cibicides wuellerstorfi* from the Arctic Ocean and its implications for age models**

**Gabriel West et al.**

*Correspondence to:* Gabriel West ([gabriel.west@geo.su.se](mailto:gabriel.west@geo.su.se)) and Matt O'Regan ([matt.oregan@geo.su.se](mailto:matt.oregan@geo.su.se))

The copyright of individual parts of the supplement might differ from the article licence.

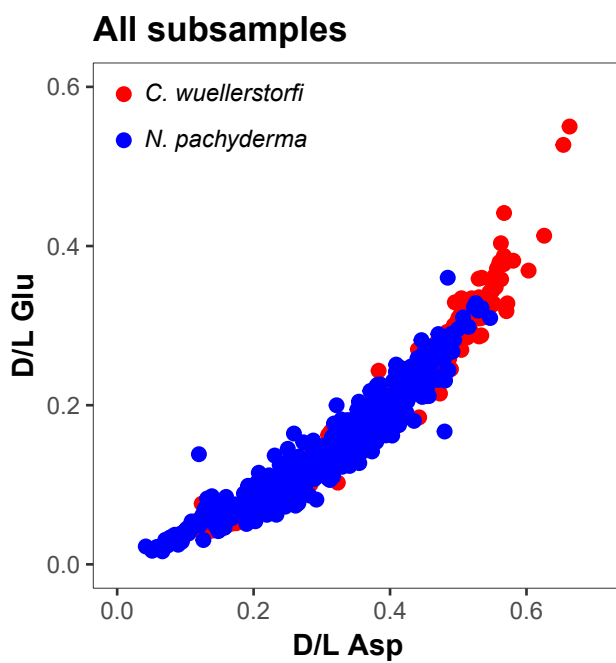

***N. pachyderma***

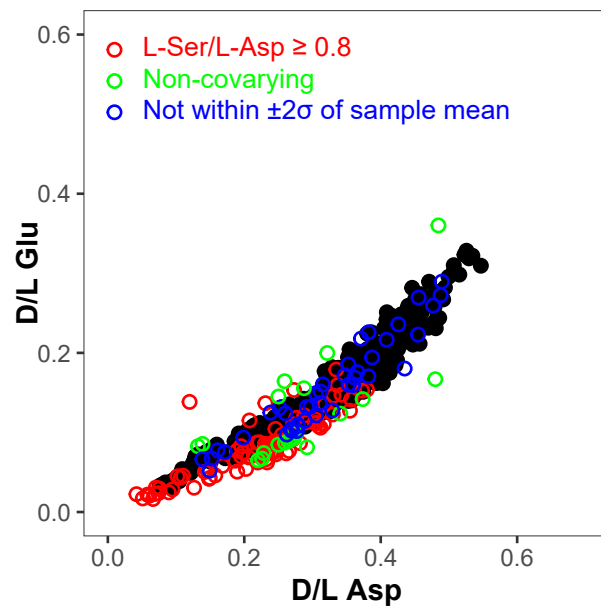

***C. wuellerstorfi***

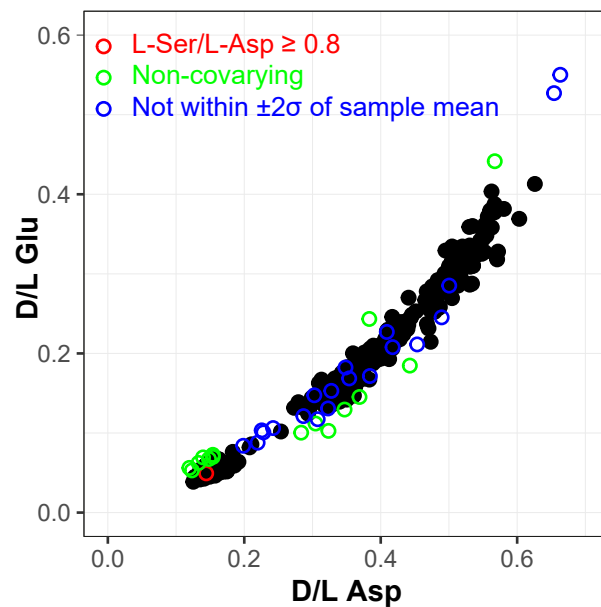

Supplementary Figure S1: Covariance of aspartic acid and glutamic acid D/L values in all subsamples prior to data screening (left), and following data rejection (right) in *N. pachyderma* and *C. wuellerstorfi*. Open symbols represent rejected subsamples.

Supplementary Table S1.

| UAl     | Core          | Section | Interval (cm) | Core depth (m) | Genus/sp.     | n tests | DLAsp | DLGlu | **Rejection criterion |
|---------|---------------|---------|---------------|----------------|---------------|---------|-------|-------|-----------------------|
| 15866 A | LOMROG12-PC07 | 1       | 9.5-11.5      | 0.02           | N. pachyderma | 10      | 0.076 | 0.033 | not rejected          |
| 15866 B | LOMROG12-PC07 | 1       | 9.5-11.5      | 0.02           | N. pachyderma | 10      | 0.084 | 0.036 | not rejected          |
| 15866 C | LOMROG12-PC07 | 1       | 9.5-11.5      | 0.02           | N. pachyderma | 10      | 0.075 | 0.029 | 1                     |
| 15866 D | LOMROG12-PC07 | 1       | 9.5-11.5      | 0.02           | N. pachyderma | 10      | 0.084 | 0.037 | not rejected          |
| 15866 E | LOMROG12-PC07 | 1       | 9.5-11.5      | 0.02           | N. pachyderma | 10      | 0.076 | 0.031 | not rejected          |
| 15866 F | LOMROG12-PC07 | 1       | 9.5-11.5      | 0.02           | N. pachyderma | 10      | 0.086 | 0.034 | not rejected          |
| 15866 G | LOMROG12-PC07 | 1       | 9.5-11.5      | 0.02           | N. pachyderma | 10      | 0.076 | 0.033 | not rejected          |
| 15866 H | LOMROG12-PC07 | 1       | 9.5-11.5      | 0.02           | N. pachyderma | 10.5    | 0.071 | 0.031 | 1                     |
| 15866 I | LOMROG12-PC07 | 1       | 9.5-11.5      | 0.02           | N. pachyderma | 11.5    | 0.082 | 0.033 | not rejected          |
| 15867 A | LOMROG12-PC07 | 1       | 24.5-26.5     | 0.165          | N. pachyderma | 10      | 0.175 | 0.075 | not rejected          |
| 15867 B | LOMROG12-PC07 | 1       | 24.5-26.5     | 0.165          | N. pachyderma | 10      | 0.151 | 0.063 | not rejected          |
| 15867 C | LOMROG12-PC07 | 1       | 24.5-26.5     | 0.165          | N. pachyderma | 10      | 0.201 | 0.082 | not rejected          |
| 15867 D | LOMROG12-PC07 | 1       | 24.5-26.5     | 0.165          | N. pachyderma | 10      | 0.265 | 0.130 | not rejected          |
| 15867 E | LOMROG12-PC07 | 1       | 24.5-26.5     | 0.165          | N. pachyderma | 10      | 0.228 | 0.094 | not rejected          |
| 15867 F | LOMROG12-PC07 | 1       | 24.5-26.5     | 0.165          | N. pachyderma | 10      | 0.226 | 0.104 | not rejected          |
| 15867 G | LOMROG12-PC07 | 1       | 24.5-26.5     | 0.165          | N. pachyderma | 10      | 0.172 | 0.068 | not rejected          |
| 15867 H | LOMROG12-PC07 | 1       | 24.5-26.5     | 0.165          | N. pachyderma | 10      | 0.237 | 0.114 | not rejected          |
| 15867 I | LOMROG12-PC07 | 1       | 24.5-26.5     | 0.165          | N. pachyderma | 10      | 0.192 | 0.083 | not rejected          |
| 15867 J | LOMROG12-PC07 | 1       | 24.5-26.5     | 0.165          | N. pachyderma | 8.5     | 0.142 | 0.050 | 1                     |
| 15868 A | LOMROG12-PC07 | 1       | 39.5-41.5     | 0.315          | N. pachyderma | 10      | 0.259 | 0.164 | 2                     |
| 15868 B | LOMROG12-PC07 | 1       | 39.5-41.6     | 0.315          | N. pachyderma | 10      | 0.254 | 0.132 | not rejected          |
| 15868 C | LOMROG12-PC07 | 1       | 39.5-41.7     | 0.315          | N. pachyderma | 10      | 0.198 | 0.075 | 1                     |
| 15868 D | LOMROG12-PC07 | 1       | 39.5-41.8     | 0.315          | N. pachyderma | 10      | 0.281 | 0.131 | not rejected          |
| 15868 E | LOMROG12-PC07 | 1       | 39.5-41.9     | 0.315          | N. pachyderma | 10      | 0.312 | 0.136 | not rejected          |
| 15868 F | LOMROG12-PC07 | 1       | 39.5-41.10    | 0.315          | N. pachyderma | 10      | 0.284 | 0.122 | not rejected          |
| 15868 G | LOMROG12-PC07 | 1       | 39.5-41.11    | 0.315          | N. pachyderma | 10      | 0.254 | 0.112 | not rejected          |
| 15868 H | LOMROG12-PC07 | 1       | 39.5-41.12    | 0.315          | N. pachyderma | 10      | 0.238 | 0.102 | not rejected          |
| 15868 I | LOMROG12-PC07 | 1       | 39.5-41.13    | 0.315          | N. pachyderma | 10      | 0.294 | 0.142 | not rejected          |
| 15868 J | LOMROG12-PC07 | 1       | 39.5-41.14    | 0.315          | N. pachyderma | 11      | 0.258 | 0.118 | not rejected          |
| 15869 A | LOMROG12-PC07 | 1       | 84.5-86.5     | 0.78           | N. pachyderma | 10      | 0.312 | 0.124 | not rejected          |
| 15869 B | LOMROG12-PC07 | 1       | 84.5-86.5     | 0.78           | N. pachyderma | 10      | 0.295 | 0.124 | not rejected          |
| 15869 C | LOMROG12-PC07 | 1       | 84.5-86.5     | 0.78           | N. pachyderma | 10      | 0.336 | 0.161 | not rejected          |
| 15869 D | LOMROG12-PC07 | 1       | 84.5-86.5     | 0.78           | N. pachyderma | 10      | 0.246 | 0.072 | 1                     |
| 15869 E | LOMROG12-PC07 | 1       | 84.5-86.5     | 0.78           | N. pachyderma | 10      | 0.290 | 0.122 | not rejected          |
| 15869 F | LOMROG12-PC07 | 1       | 84.5-86.5     | 0.78           | N. pachyderma | 10      | 0.245 | 0.094 | not rejected          |
| 15869 G | LOMROG12-PC07 | 1       | 84.5-86.5     | 0.78           | N. pachyderma | 10      | 0.284 | 0.108 | not rejected          |
| 15869 I | LOMROG12-PC07 | 1       | 84.5-86.5     | 0.78           | N. pachyderma | 10      | 0.289 | 0.115 | not rejected          |
| 15869 J | LOMROG12-PC07 | 1       | 84.5-86.5     | 0.78           | N. pachyderma | 3       | 0.299 | 0.130 | not rejected          |
| 15870 A | LOMROG12-PC07 | 2       | 17-19         | 0.98           | N. pachyderma | 10      | 0.377 | 0.188 | not rejected          |
| 15870 B | LOMROG12-PC07 | 2       | 17-19         | 0.98           | N. pachyderma | 10      | 0.339 | 0.159 | not rejected          |
| 15870 C | LOMROG12-PC07 | 2       | 17-19         | 0.98           | N. pachyderma | 10      | 0.337 | 0.159 | 1                     |
| 15870 E | LOMROG12-PC07 | 2       | 17-19         | 0.98           | N. pachyderma | 12      | 0.329 | 0.135 | not rejected          |
| 15870 F | LOMROG12-PC07 | 2       | 17-19         | 0.98           | N. pachyderma | 10      | 0.342 | 0.150 | not rejected          |
| 15870 J | LOMROG12-PC07 | 2       | 17-19         | 0.98           | N. pachyderma | 7       | 0.382 | 0.182 | not rejected          |
| 15871 A | LOMROG12-PC07 | 2       | 36-38         | 1.17           | N. pachyderma | 10      | 0.250 | 0.145 | 2                     |
| 15871 B | LOMROG12-PC07 | 2       | 36-38         | 1.17           | N. pachyderma | 10      | 0.359 | 0.160 | not rejected          |
| 15871 C | LOMROG12-PC07 | 2       | 36-38         | 1.17           | N. pachyderma | 10      | 0.405 | 0.204 | not rejected          |
| 15871 D | LOMROG12-PC07 | 2       | 36-38         | 1.17           | N. pachyderma | 10      | 0.412 | 0.231 | not rejected          |
| 15871 E | LOMROG12-PC07 | 2       | 36-38         | 1.17           | N. pachyderma | 10      | 0.361 | 0.200 | not rejected          |
| 15871 F | LOMROG12-PC07 | 2       | 36-38         | 1.17           | N. pachyderma | 10      | 0.344 | 0.159 | not rejected          |
| 15871 G | LOMROG12-PC07 | 2       | 36-38         | 1.17           | N. pachyderma | 10      | 0.331 | 0.146 | 1                     |
| 15871 H | LOMROG12-PC07 | 2       | 36-38         | 1.17           | N. pachyderma | 10      | 0.354 | 0.181 | not rejected          |
| 15871 I | LOMROG12-PC07 | 2       | 36-38         | 1.17           | N. pachyderma | 13      | 0.291 | 0.113 | 1                     |
| 15872 A | LOMROG12-PC07 | 2       | 61.5-63.5     | 1.425          | N. pachyderma | 10      | 0.417 | 0.193 | not rejected          |
| 15872 B | LOMROG12-PC07 | 2       | 61.5-63.5     | 1.425          | N. pachyderma | 10      | 0.447 | 0.210 | not rejected          |
| 15872 C | LOMROG12-PC07 | 2       | 61.5-63.5     | 1.425          | N. pachyderma | 10      | 0.423 | 0.213 | not rejected          |
| 15872 D | LOMROG12-PC07 | 2       | 61.5-63.5     | 1.425          | N. pachyderma | 10      | 0.206 | 0.069 | 1                     |
| 15872 E | LOMROG12-PC07 | 2       | 61.5-63.5     | 1.425          | N. pachyderma | 10      | 0.375 | 0.161 | not rejected          |
| 15872 F | LOMROG12-PC07 | 2       | 61.5-63.5     | 1.425          | N. pachyderma | 10      | 0.120 | 0.138 | 1                     |
| 15872 G | LOMROG12-PC07 | 2       | 61.5-63.5     | 1.425          | N. pachyderma | 10.5    | 0.306 | 0.112 | 1                     |
| 15872 H | LOMROG12-PC07 | 2       | 61.5-63.5     | 1.425          | N. pachyderma | 10.5    | 0.357 | 0.147 | not rejected          |
| 15872 I | LOMROG12-PC07 | 2       | 61.5-63.5     | 1.425          | N. pachyderma | 7       | 0.374 | 0.176 | not rejected          |
| 15873 A | LOMROG12-PC07 | 2       | 77-79         | 1.58           | N. pachyderma | 10      | 0.389 | 0.200 | not rejected          |
| 15873 B | LOMROG12-PC07 | 2       | 77-79         | 1.58           | N. pachyderma | 10      | 0.276 | 0.118 | 1                     |

| UAL     | Core           | Section | Interval (cm) | Core depth (m) | Genus/sp.        | *n tests | DLAsp | DLGlu | **Rejection criterion |
|---------|----------------|---------|---------------|----------------|------------------|----------|-------|-------|-----------------------|
| 15873 C | LOMROG12-PC07  | 2       | 77-79         | 1.58           | N. pachyderma    | 10       | 0.304 | 0.112 | 1                     |
| 15873 D | LOMROG12-PC07  | 2       | 77-79         | 1.58           | N. pachyderma    | 10       | 0.365 | 0.160 | not rejected          |
| 15873 E | LOMROG12-PC07  | 2       | 77-79         | 1.58           | N. pachyderma    | 10       | 0.378 | 0.169 | not rejected          |
| 15873 F | LOMROG12-PC07  | 2       | 77-79         | 1.58           | N. pachyderma    | 10       | 0.417 | 0.203 | not rejected          |
| 15873 G | LOMROG12-PC07  | 2       | 77-79         | 1.58           | N. pachyderma    | 10       | 0.346 | 0.144 | not rejected          |
| 15873 H | LOMROG12-PC07  | 2       | 77-79         | 1.58           | N. pachyderma    | 10       | 0.333 | 0.149 | not rejected          |
| 15873 I | LOMROG12-PC07  | 2       | 77-79         | 1.58           | N. pachyderma    | 11       | 0.344 | 0.148 | not rejected          |
| 15874 A | LOMROG12-PC07  | 2       | 91-93         | 1.72           | N. pachyderma    | 10       | 0.351 | 0.145 | not rejected          |
| 15874 B | LOMROG12-PC07  | 2       | 91-93         | 1.72           | N. pachyderma    | 10       | 0.058 | 0.022 | 1                     |
| 15874 C | LOMROG12-PC07  | 2       | 91-93         | 1.72           | N. pachyderma    | 10       | 0.418 | 0.204 | not rejected          |
| 15874 D | LOMROG12-PC07  | 2       | 91-93         | 1.72           | N. pachyderma    | 10       | 0.269 | 0.091 | 2                     |
| 15874 E | LOMROG12-PC07  | 2       | 91-93         | 1.72           | N. pachyderma    | 10       | 0.401 | 0.204 | not rejected          |
| 15874 F | LOMROG12-PC07  | 2       | 91-93         | 1.72           | N. pachyderma    | 10       | 0.305 | 0.116 | 1                     |
| 15874 G | LOMROG12-PC07  | 2       | 91-93         | 1.72           | N. pachyderma    | 10       | 0.366 | 0.150 | not rejected          |
| 15874 H | LOMROG12-PC07  | 2       | 91-93         | 1.72           | N. pachyderma    | 10       | 0.382 | 0.167 | not rejected          |
| 15874 I | LOMROG12-PC07  | 2       | 91-93         | 1.72           | N. pachyderma    | 12       | 0.391 | 0.171 | not rejected          |
| 15875 A | LOMROG12-PC07  | 3       | 122-124       | 3.537          | N. pachyderma    | 10       | 0.279 | 0.120 | not rejected          |
| 15875 B | LOMROG12-PC07  | 3       | 122-124       | 3.537          | N. pachyderma    | 10       | 0.302 | 0.147 | not rejected          |
| 15875 C | LOMROG12-PC07  | 3       | 122-124       | 3.537          | N. pachyderma    | 10       | 0.256 | 0.104 | not rejected          |
| 15875 D | LOMROG12-PC07  | 3       | 122-124       | 3.537          | N. pachyderma    | 10       | 0.306 | 0.136 | not rejected          |
| 15875 E | LOMROG12-PC07  | 3       | 122-124       | 3.537          | N. pachyderma    | 10       | 0.354 | 0.153 | not rejected          |
| 15875 F | LOMROG12-PC07  | 3       | 122-124       | 3.537          | N. pachyderma    | 10       | 0.274 | 0.100 | 1                     |
| 15875 G | LOMROG12-PC07  | 3       | 122-124       | 3.537          | N. pachyderma    | 10       | 0.335 | 0.137 | not rejected          |
| 15875 H | LOMROG12-PC07  | 3       | 122-124       | 3.537          | N. pachyderma    | 10       | 0.248 | 0.087 | 1                     |
| 15875 I | LOMROG12-PC07  | 3       | 122-124       | 3.537          | N. pachyderma    | 10       | 0.271 | 0.110 | 1                     |
| 15876 A | LOMROG12-PC07  | 3       | 134-136       | 3.657          | N. pachyderma    | 10       | 0.266 | 0.135 | not rejected          |
| 15876 B | LOMROG12-PC07  | 3       | 134-136       | 3.657          | N. pachyderma    | 10       | 0.337 | 0.163 | not rejected          |
| 15876 C | LOMROG12-PC07  | 3       | 134-136       | 3.657          | N. pachyderma    | 10       | 0.386 | 0.226 | not rejected          |
| 15876 D | LOMROG12-PC07  | 3       | 134-136       | 3.657          | N. pachyderma    | 10       | 0.388 | 0.204 | not rejected          |
| 15876 E | LOMROG12-PC07  | 3       | 134-136       | 3.657          | N. pachyderma    | 10       | 0.364 | 0.178 | not rejected          |
| 15876 F | LOMROG12-PC07  | 3       | 134-136       | 3.657          | N. pachyderma    | 10       | 0.367 | 0.167 | not rejected          |
| 15876 G | LOMROG12-PC07  | 3       | 134-136       | 3.657          | N. pachyderma    | 10       | 0.329 | 0.182 | not rejected          |
| 15876 H | LOMROG12-PC07  | 3       | 134-136       | 3.657          | N. pachyderma    | 10       | 0.430 | 0.234 | not rejected          |
| 15876 I | LOMROG12-PC07  | 3       | 134-136       | 3.657          | N. pachyderma    | 12       | 0.319 | 0.174 | not rejected          |
| 15877 A | LOMROG12-PC07  | 3       | 147-149       | 3.787          | N. pachyderma    | 8        | 0.288 | 0.121 | 1                     |
| 15877 C | LOMROG12-PC07  | 3       | 147-149       | 3.787          | N. pachyderma    | 9        | 0.187 | 0.064 | 1                     |
| 15877 D | LOMROG12-PC07  | 3       | 147-149       | 3.787          | N. pachyderma    | 10       | 0.348 | 0.174 | not rejected          |
| 15877 E | LOMROG12-PC07  | 3       | 147-149       | 3.787          | N. pachyderma    | 7        | 0.231 | 0.137 | 1                     |
| 15878 A | LOMROG12-PC07  | 4       | 39-41         | 4.21           | N. pachyderma    | 10       | 0.414 | 0.182 | not rejected          |
| 15878 B | LOMROG12-PC07  | 4       | 39-41         | 4.21           | N. pachyderma    | 10       | 0.318 | 0.135 | 1                     |
| 15878 C | LOMROG12-PC07  | 4       | 39-41         | 4.21           | N. pachyderma    | 10       | 0.222 | 0.088 | 1                     |
| 15878 E | LOMROG12-PC07  | 4       | 39-41         | 4.21           | N. pachyderma    | 10       | 0.404 | 0.203 | not rejected          |
| 15878 F | LOMROG12-PC07  | 4       | 39-41         | 4.21           | N. pachyderma    | 10       | 0.389 | 0.195 | not rejected          |
| 15878 G | LOMROG12-PC07  | 4       | 39-41         | 4.21           | N. pachyderma    | 7        | 0.353 | 0.160 | 3                     |
| 15879 A | LOMROG12-PC07  | 4       | 58.5-60.5     | 4.405          | N. pachyderma    | 10       | 0.344 | 0.155 | not rejected          |
| 15879 B | LOMROG12-PC07  | 4       | 58.5-60.5     | 4.405          | N. pachyderma    | 10       | 0.334 | 0.148 | not rejected          |
| 15879 C | LOMROG12-PC07  | 4       | 58.5-60.5     | 4.405          | N. pachyderma    | 10       | 0.409 | 0.217 | 3                     |
| 15879 D | LOMROG12-PC07  | 4       | 58.5-60.5     | 4.405          | N. pachyderma    | 10       | 0.313 | 0.140 | not rejected          |
| 15879 E | LOMROG12-PC07  | 4       | 58.5-60.5     | 4.405          | N. pachyderma    | 10       | 0.348 | 0.171 | not rejected          |
| 15879 F | LOMROG12-PC07  | 4       | 58.5-60.5     | 4.405          | N. pachyderma    | 10       | 0.338 | 0.159 | not rejected          |
| 15879 G | LOMROG12-PC07  | 4       | 58.5-60.5     | 4.405          | N. pachyderma    | 10       | 0.237 | 0.085 | 1                     |
| 15880 A | LOMROG12-PC07  | 4       | 69-71         | 4.51           | N. pachyderma    | 10       | 0.287 | 0.121 | not rejected          |
| 15880 B | LOMROG12-PC07  | 4       | 69-71         | 4.51           | N. pachyderma    | 10       | 0.328 | 0.169 | not rejected          |
| 15880 C | LOMROG12-PC07  | 4       | 69-71         | 4.51           | N. pachyderma    | 10       | 0.110 | 0.046 | 1                     |
| 15880 D | LOMROG12-PC07  | 4       | 69-71         | 4.51           | N. pachyderma    | 10       | 0.246 | 0.104 | 1                     |
| 15880 E | LOMROG12-PC07  | 4       | 69-71         | 4.51           | N. pachyderma    | 8        | 0.309 | 0.108 | 1                     |
| 17327 A | LOMROG12-TWC03 | TWC     | 24 - 26       | 0.215          | C. wuellerstorfi | 5        | 0.344 | 0.159 | not rejected          |
| 17327 B | LOMROG12-TWC03 | TWC     | 24 - 26       | 0.215          | C. wuellerstorfi | 5        | 0.336 | 0.163 | not rejected          |
| 17327 C | LOMROG12-TWC03 | TWC     | 24 - 26       | 0.215          | C. wuellerstorfi | 5        | 0.338 | 0.157 | not rejected          |
| 17327 D | LOMROG12-TWC03 | TWC     | 24 - 26       | 0.215          | C. wuellerstorfi | 5        | 0.345 | 0.156 | not rejected          |
| 17327 E | LOMROG12-TWC03 | TWC     | 24 - 26       | 0.215          | C. wuellerstorfi | 5        | 0.341 | 0.164 | not rejected          |
| 17327 F | LOMROG12-TWC03 | TWC     | 24 - 26       | 0.215          | C. wuellerstorfi | 5        | 0.348 | 0.167 | not rejected          |
| 17327 G | LOMROG12-TWC03 | TWC     | 24 - 26       | 0.215          | C. wuellerstorfi | 5        | 0.348 | 0.169 | not rejected          |
| 17327 H | LOMROG12-TWC03 | TWC     | 24 - 26       | 0.215          | C. wuellerstorfi | 5        | 0.330 | 0.150 | not rejected          |
| 17328 A | LOMROG12-PC03  | 1       | 61 - 63       | 0.54           | C. wuellerstorfi | 5        | 0.433 | 0.224 | not rejected          |

| UAL     | Core          | Section | Interval (cm) | Core depth (m) | Genus/sp.        | *n tests | DLAsp | DLGlu | **Rejection criterion |
|---------|---------------|---------|---------------|----------------|------------------|----------|-------|-------|-----------------------|
| 17328 B | LOMROG12-PC03 | 1       | 61 - 63       | 0.54           | C. wuellerstorfi | 5        | 0.424 | 0.225 | not rejected          |
| 17328 C | LOMROG12-PC03 | 1       | 61 - 63       | 0.54           | C. wuellerstorfi | 5        | 0.422 | 0.230 | not rejected          |
| 17328 D | LOMROG12-PC03 | 1       | 61 - 63       | 0.54           | C. wuellerstorfi | 5        | 0.422 | 0.228 | not rejected          |
| 17328 E | LOMROG12-PC03 | 1       | 61 - 63       | 0.54           | C. wuellerstorfi | 5        | 0.446 | 0.249 | not rejected          |
| 17328 F | LOMROG12-PC03 | 1       | 61 - 63       | 0.54           | C. wuellerstorfi | 5        | 0.444 | 0.245 | not rejected          |
| 17328 G | LOMROG12-PC03 | 1       | 61 - 63       | 0.54           | C. wuellerstorfi | 5        | 0.434 | 0.233 | not rejected          |
| 17328 H | LOMROG12-PC03 | 1       | 61 - 63       | 0.54           | C. wuellerstorfi | 6        | 0.439 | 0.241 | not rejected          |
| 17329 A | LOMROG12-PC03 | 2       | 0 - 2         | 0.741          | C. wuellerstorfi | 5        | 0.480 | 0.282 | not rejected          |
| 17329 B | LOMROG12-PC03 | 2       | 0 - 2         | 0.741          | C. wuellerstorfi | 5        | 0.482 | 0.270 | not rejected          |
| 17329 C | LOMROG12-PC03 | 2       | 0 - 2         | 0.741          | C. wuellerstorfi | 5        | 0.479 | 0.278 | not rejected          |
| 17329 D | LOMROG12-PC03 | 2       | 0 - 2         | 0.741          | C. wuellerstorfi | 5        | 0.491 | 0.286 | not rejected          |
| 17329 E | LOMROG12-PC03 | 2       | 0 - 2         | 0.741          | C. wuellerstorfi | 5        | 0.497 | 0.297 | not rejected          |
| 17329 F | LOMROG12-PC03 | 2       | 0 - 2         | 0.741          | C. wuellerstorfi | 5        | 0.475 | 0.284 | not rejected          |
| 17329 G | LOMROG12-PC03 | 2       | 0 - 2         | 0.741          | C. wuellerstorfi | 5        | 0.488 | 0.288 | not rejected          |
| 17329 H | LOMROG12-PC03 | 2       | 0 - 2         | 0.741          | C. wuellerstorfi | 5        | 0.567 | 0.442 | 2                     |
| 17330 A | LOMROG12-PC03 | 2       | 53 - 55       | 1.271          | C. wuellerstorfi | 5        | 0.531 | 0.309 | not rejected          |
| 17330 B | LOMROG12-PC03 | 2       | 53 - 55       | 1.271          | C. wuellerstorfi | 5        | 0.663 | 0.550 | 3                     |
| 17330 C | LOMROG12-PC03 | 2       | 53 - 55       | 1.271          | C. wuellerstorfi | 5        | 0.550 | 0.354 | not rejected          |
| 17330 D | LOMROG12-PC03 | 2       | 53 - 55       | 1.271          | C. wuellerstorfi | 5        | 0.548 | 0.325 | not rejected          |
| 17330 E | LOMROG12-PC03 | 2       | 53 - 55       | 1.271          | C. wuellerstorfi | 5        | 0.546 | 0.342 | not rejected          |
| 17330 F | LOMROG12-PC03 | 2       | 53 - 55       | 1.271          | C. wuellerstorfi | 5        | 0.527 | 0.312 | not rejected          |
| 17330 G | LOMROG12-PC03 | 2       | 53 - 55       | 1.271          | C. wuellerstorfi | 5        | 0.549 | 0.343 | not rejected          |
| 17330 H | LOMROG12-PC03 | 2       | 53 - 55       | 1.271          | C. wuellerstorfi | 5        | 0.535 | 0.310 | not rejected          |
| 17331 A | AO16-5-PC1    | 1       | 8 - 10        | 0.09           | C. wuellerstorfi | 4        | 0.339 | 0.155 | not rejected          |
| 17331 B | AO16-5-PC1    | 1       | 8 - 10        | 0.09           | C. wuellerstorfi | 4        | 0.323 | 0.131 | 3                     |
| 17331 C | AO16-5-PC1    | 1       | 8 - 10        | 0.09           | C. wuellerstorfi | 4        | 0.331 | 0.142 | not rejected          |
| 17331 D | AO16-5-PC1    | 1       | 8 - 10        | 0.09           | C. wuellerstorfi | 2        | 0.321 | 0.152 | not rejected          |
| 17331 E | AO16-5-PC1    | 1       | 8 - 10        | 0.09           | C. wuellerstorfi | 4        | 0.350 | 0.160 | not rejected          |
| 17331 F | AO16-5-PC1    | 1       | 8 - 10        | 0.09           | C. wuellerstorfi | 4        | 0.343 | 0.157 | not rejected          |
| 17331 G | AO16-5-PC1    | 1       | 8 - 10        | 0.09           | C. wuellerstorfi | 4        | 0.343 | 0.161 | not rejected          |
| 17331 H | AO16-5-PC1    | 1       | 8 - 10        | 0.09           | C. wuellerstorfi | 4        | 0.363 | 0.158 | not rejected          |
| 17331 I | AO16-5-PC1    | 1       | 8 - 10        | 0.09           | C. wuellerstorfi | 4        | 0.349 | 0.160 | not rejected          |
| 17331 J | AO16-5-PC1    | 1       | 8 - 10        | 0.09           | C. wuellerstorfi | 4        | 0.339 | 0.148 | not rejected          |
| 17333 A | AO16-5-PC1    | 1       | 136 - 138     | 1.37           | C. wuellerstorfi | 4        | 0.562 | 0.403 | not rejected          |
| 17333 B | AO16-5-PC1    | 1       | 136 - 138     | 1.37           | C. wuellerstorfi | 4        | 0.520 | 0.334 | not rejected          |
| 17333 C | AO16-5-PC1    | 1       | 136 - 138     | 1.37           | C. wuellerstorfi | 4        | 0.514 | 0.320 | not rejected          |
| 17333 D | AO16-5-PC1    | 1       | 136 - 138     | 1.37           | C. wuellerstorfi | 4        | 0.505 | 0.317 | not rejected          |
| 17333 E | AO16-5-PC1    | 1       | 136 - 138     | 1.37           | C. wuellerstorfi | 4        | 0.654 | 0.527 | 3                     |
| 17333 F | AO16-5-PC1    | 1       | 136 - 138     | 1.37           | C. wuellerstorfi | 4        | 0.521 | 0.326 | not rejected          |
| 17333 G | AO16-5-PC1    | 1       | 136 - 138     | 1.37           | C. wuellerstorfi | 5        | 0.530 | 0.336 | not rejected          |
| 17336 A | AO16-9-PC1    | 1       | 18 - 20       | 0.19           | N. pachyderma    | 15       | 0.144 | 0.075 | not rejected          |
| 17336 B | AO16-9-PC1    | 1       | 18 - 20       | 0.19           | N. pachyderma    | 15       | 0.160 | 0.085 | not rejected          |
| 17336 C | AO16-9-PC1    | 1       | 18 - 20       | 0.19           | N. pachyderma    | 15       | 0.152 | 0.079 | not rejected          |
| 17336 D | AO16-9-PC1    | 1       | 18 - 20       | 0.19           | N. pachyderma    | 15       | 0.152 | 0.072 | not rejected          |
| 17336 E | AO16-9-PC1    | 1       | 18 - 20       | 0.19           | N. pachyderma    | 15       | 0.139 | 0.086 | 2                     |
| 17336 F | AO16-9-PC1    | 1       | 18 - 20       | 0.19           | N. pachyderma    | 15       | 0.137 | 0.067 | not rejected          |
| 17336 G | AO16-9-PC1    | 1       | 18 - 20       | 0.19           | N. pachyderma    | 15       | 0.149 | 0.074 | not rejected          |
| 17336 H | AO16-9-PC1    | 1       | 18 - 20       | 0.19           | N. pachyderma    | 15       | 0.141 | 0.070 | not rejected          |
| 17336 I | AO16-9-PC1    | 1       | 18 - 20       | 0.19           | N. pachyderma    | 15       | 0.121 | 0.049 | not rejected          |
| 17336 J | AO16-9-PC1    | 1       | 18 - 20       | 0.19           | N. pachyderma    | 15       | 0.117 | 0.054 | not rejected          |
| 17337 A | AO16-9-PC1    | 1       | 20 - 22       | 0.21           | N. pachyderma    | 15       | 0.208 | 0.098 | not rejected          |
| 17337 B | AO16-9-PC1    | 1       | 20 - 22       | 0.21           | N. pachyderma    | 15       | 0.216 | 0.109 | not rejected          |
| 17337 C | AO16-9-PC1    | 1       | 20 - 22       | 0.21           | N. pachyderma    | 15       | 0.204 | 0.101 | not rejected          |
| 17337 D | AO16-9-PC1    | 1       | 20 - 22       | 0.21           | N. pachyderma    | 15       | 0.224 | 0.108 | not rejected          |
| 17337 E | AO16-9-PC1    | 1       | 20 - 22       | 0.21           | N. pachyderma    | 15       | 0.252 | 0.131 | 3                     |
| 17337 F | AO16-9-PC1    | 1       | 20 - 22       | 0.21           | N. pachyderma    | 15       | 0.223 | 0.112 | not rejected          |
| 17337 G | AO16-9-PC1    | 1       | 20 - 22       | 0.21           | N. pachyderma    | 15       | 0.209 | 0.102 | not rejected          |
| 17337 H | AO16-9-PC1    | 1       | 20 - 22       | 0.21           | N. pachyderma    | 15       | 0.205 | 0.103 | not rejected          |
| 17337 I | AO16-9-PC1    | 1       | 20 - 22       | 0.21           | N. pachyderma    | 15       | 0.192 | 0.099 | not rejected          |
| 17337 J | AO16-9-PC1    | 1       | 20 - 22       | 0.21           | N. pachyderma    | 15       | 0.212 | 0.107 | not rejected          |
| 17338 A | AO16-9-PC1    | 2       | 70 - 72       | 0.97           | N. pachyderma    | 15       | 0.244 | 0.088 | 1                     |
| 17338 B | AO16-9-PC1    | 2       | 70 - 72       | 0.97           | N. pachyderma    | 15       | 0.409 | 0.242 | not rejected          |
| 17338 C | AO16-9-PC1    | 2       | 70 - 72       | 0.97           | N. pachyderma    | 15       | 0.417 | 0.246 | not rejected          |
| 17338 D | AO16-9-PC1    | 2       | 70 - 72       | 0.97           | N. pachyderma    | 15       | 0.446 | 0.282 | not rejected          |
| 17338 E | AO16-9-PC1    | 2       | 70 - 72       | 0.97           | N. pachyderma    | 15       | 0.429 | 0.243 | not rejected          |

| UAL     | Core           | Section | Interval (cm) | Core depth (m) | Genus/sp.        | *n tests | DLAsp | DLGlu | **Rejection criterion |
|---------|----------------|---------|---------------|----------------|------------------|----------|-------|-------|-----------------------|
| 17338 F | AO16-9-PC1     | 2       | 70 - 72       | 0.97           | N. pachyderma    | 15       | 0.195 | 0.083 | 1                     |
| 17338 G | AO16-9-PC1     | 2       | 70 - 72       | 0.97           | N. pachyderma    | 15       | 0.394 | 0.199 | not rejected          |
| 17338 H | AO16-9-PC1     | 2       | 70 - 72       | 0.97           | N. pachyderma    | 15       | 0.189 | 0.077 | 1                     |
| 17339 A | AO16-9-PC1     | 2       | 98 - 102      | 1.26           | N. pachyderma    | 15       | 0.322 | 0.200 | 2                     |
| 17339 B | AO16-9-PC1     | 2       | 98 - 102      | 1.26           | N. pachyderma    | 15       | 0.419 | 0.219 | not rejected          |
| 17339 C | AO16-9-PC1     | 2       | 98 - 102      | 1.26           | N. pachyderma    | 15       | 0.485 | 0.360 | 2                     |
| 17339 D | AO16-9-PC1     | 2       | 98 - 102      | 1.26           | N. pachyderma    | 15       | 0.450 | 0.267 | not rejected          |
| 17339 E | AO16-9-PC1     | 2       | 98 - 102      | 1.26           | N. pachyderma    | 15       | 0.238 | 0.125 | 3                     |
| 17339 F | AO16-9-PC1     | 2       | 98 - 102      | 1.26           | N. pachyderma    | 15       | 0.260 | 0.124 | 3                     |
| 17339 G | AO16-9-PC1     | 2       | 98 - 102      | 1.26           | N. pachyderma    | 15       | 0.459 | 0.274 | not rejected          |
| 17339 H | AO16-9-PC1     | 2       | 98 - 102      | 1.26           | N. pachyderma    | 15       | 0.449 | 0.247 | not rejected          |
| 17339 I | AO16-9-PC1     | 2       | 98 - 102      | 1.26           | N. pachyderma    | 15       | 0.366 | 0.176 | 3                     |
| 17339 J | AO16-9-PC1     | 2       | 98 - 102      | 1.26           | N. pachyderma    | 15       | 0.449 | 0.260 | not rejected          |
| 17341 A | AO16-9-PC1     | 1       | 18 - 20       | 0.19           | C. wuellerstorfi | 4        | 0.273 | 0.132 | not rejected          |
| 17341 B | AO16-9-PC1     | 1       | 18 - 20       | 0.19           | C. wuellerstorfi | 4        | 0.170 | 0.054 | not rejected          |
| 17341 C | AO16-9-PC1     | 1       | 18 - 20       | 0.19           | C. wuellerstorfi | 4        | 0.171 | 0.057 | not rejected          |
| 17341 D | AO16-9-PC1     | 1       | 18 - 20       | 0.19           | C. wuellerstorfi | 4        | 0.210 | 0.086 | not rejected          |
| 17341 E | AO16-9-PC1     | 1       | 18 - 20       | 0.19           | C. wuellerstorfi | 4        | 0.341 | 0.164 | not rejected          |
| 17341 F | AO16-9-PC1     | 1       | 18 - 20       | 0.19           | C. wuellerstorfi | 4        | 0.254 | 0.102 | not rejected          |
| 17341 G | AO16-9-PC1     | 1       | 18 - 20       | 0.19           | C. wuellerstorfi | 4        | 0.295 | 0.129 | not rejected          |
| 17341 H | AO16-9-PC1     | 1       | 18 - 20       | 0.19           | C. wuellerstorfi | 4        | 0.183 | 0.067 | not rejected          |
| 17341 I | AO16-9-PC1     | 1       | 18 - 20       | 0.19           | C. wuellerstorfi | 4        | 0.279 | 0.139 | not rejected          |
| 17341 J | AO16-9-PC1     | 1       | 18 - 20       | 0.19           | C. wuellerstorfi | 4        | 0.173 | 0.062 | not rejected          |
| 17342 A | AO16-9-PC1     | 1       | 20 - 22       | 0.21           | C. wuellerstorfi | 4        | 0.351 | 0.183 | not rejected          |
| 17342 B | AO16-9-PC1     | 1       | 20 - 22       | 0.21           | C. wuellerstorfi | 4        | 0.299 | 0.144 | not rejected          |
| 17342 C | AO16-9-PC1     | 1       | 20 - 22       | 0.21           | C. wuellerstorfi | 4        | 0.242 | 0.106 | 3                     |
| 17342 D | AO16-9-PC1     | 1       | 20 - 22       | 0.21           | C. wuellerstorfi | 4        | 0.334 | 0.160 | not rejected          |
| 17342 E | AO16-9-PC1     | 1       | 20 - 22       | 0.21           | C. wuellerstorfi | 4        | 0.357 | 0.181 | not rejected          |
| 17342 F | AO16-9-PC1     | 1       | 20 - 22       | 0.21           | C. wuellerstorfi | 4        | 0.343 | 0.162 | not rejected          |
| 17342 G | AO16-9-PC1     | 1       | 20 - 22       | 0.21           | C. wuellerstorfi | 4        | 0.336 | 0.169 | not rejected          |
| 17342 H | AO16-9-PC1     | 1       | 20 - 22       | 0.21           | C. wuellerstorfi | 4        | 0.294 | 0.124 | not rejected          |
| 17342 I | AO16-9-PC1     | 1       | 20 - 22       | 0.21           | C. wuellerstorfi | 4        | 0.284 | 0.132 | not rejected          |
| 17342 J | AO16-9-PC1     | 1       | 20 - 22       | 0.21           | C. wuellerstorfi | 4        | 0.334 | 0.166 | not rejected          |
| 17343 A | AO16-9-PC1     | 2       | 70 - 72       | 0.97           | C. wuellerstorfi | 4        | 0.505 | 0.325 | not rejected          |
| 17343 B | AO16-9-PC1     | 2       | 70 - 72       | 0.97           | C. wuellerstorfi | 4        | 0.497 | 0.302 | not rejected          |
| 17343 C | AO16-9-PC1     | 2       | 70 - 72       | 0.97           | C. wuellerstorfi | 4        | 0.507 | 0.315 | not rejected          |
| 17343 D | AO16-9-PC1     | 2       | 70 - 72       | 0.97           | C. wuellerstorfi | 4        | 0.511 | 0.308 | not rejected          |
| 17343 E | AO16-9-PC1     | 2       | 70 - 72       | 0.97           | C. wuellerstorfi | 4        | 0.494 | 0.300 | not rejected          |
| 17343 F | AO16-9-PC1     | 2       | 70 - 72       | 0.97           | C. wuellerstorfi | 4        | 0.501 | 0.308 | not rejected          |
| 17343 G | AO16-9-PC1     | 2       | 70 - 72       | 0.97           | C. wuellerstorfi | 4        | 0.503 | 0.309 | not rejected          |
| 17343 H | AO16-9-PC1     | 2       | 70 - 72       | 0.97           | C. wuellerstorfi | 4        | 0.504 | 0.301 | not rejected          |
| 17343 I | AO16-9-PC1     | 2       | 70 - 72       | 0.97           | C. wuellerstorfi | 4        | 0.500 | 0.310 | not rejected          |
| 17343 J | AO16-9-PC1     | 2       | 70 - 72       | 0.97           | C. wuellerstorfi | 4        | 0.495 | 0.329 | not rejected          |
| 17344 A | AO16-9-PC1     | 2       | 98 - 102      | 1.26           | C. wuellerstorfi | 4        | 0.519 | 0.320 | not rejected          |
| 17344 B | AO16-9-PC1     | 2       | 98 - 102      | 1.26           | C. wuellerstorfi | 4        | 0.522 | 0.312 | not rejected          |
| 17344 C | AO16-9-PC1     | 2       | 98 - 102      | 1.26           | C. wuellerstorfi | 4        | 0.527 | 0.328 | not rejected          |
| 17344 D | AO16-9-PC1     | 2       | 98 - 102      | 1.26           | C. wuellerstorfi | 4        | 0.534 | 0.329 | not rejected          |
| 17344 E | AO16-9-PC1     | 2       | 98 - 102      | 1.26           | C. wuellerstorfi | 4        | 0.522 | 0.321 | not rejected          |
| 17344 F | AO16-9-PC1     | 2       | 98 - 102      | 1.26           | C. wuellerstorfi | 4        | 0.532 | 0.331 | not rejected          |
| 17344 G | AO16-9-PC1     | 2       | 98 - 102      | 1.26           | C. wuellerstorfi | 4        | 0.523 | 0.309 | not rejected          |
| 17344 H | AO16-9-PC1     | 2       | 98 - 102      | 1.26           | C. wuellerstorfi | 4        | 0.509 | 0.324 | not rejected          |
| 17344 I | AO16-9-PC1     | 2       | 98 - 102      | 1.26           | C. wuellerstorfi | 4        | 0.518 | 0.325 | not rejected          |
| 17344 J | AO16-9-PC1     | 2       | 98 - 102      | 1.26           | C. wuellerstorfi | 4        | 0.519 | 0.312 | not rejected          |
| 17346 A | AO16-9-PC1     | 3       | 62 - 64       | 2.415          | C. wuellerstorfi | 4        | 0.304 | 0.112 | 2                     |
| 17346 B | AO16-9-PC1     | 3       | 62 - 64       | 2.415          | C. wuellerstorfi | 4        | 0.571 | 0.318 | not rejected          |
| 17346 C | AO16-9-PC1     | 3       | 62 - 64       | 2.415          | C. wuellerstorfi | 4        | 0.572 | 0.328 | not rejected          |
| 17346 D | AO16-9-PC1     | 3       | 62 - 64       | 2.415          | C. wuellerstorfi | 4        | 0.412 | 0.193 | not rejected          |
| 17346 E | AO16-9-PC1     | 3       | 62 - 64       | 2.415          | C. wuellerstorfi | 4        | 0.283 | 0.100 | 2                     |
| 17346 F | AO16-9-PC1     | 3       | 62 - 64       | 2.415          | C. wuellerstorfi | 4        | 0.479 | 0.269 | not rejected          |
| 17346 G | AO16-9-PC1     | 3       | 62 - 64       | 2.415          | C. wuellerstorfi | 4        | 0.603 | 0.369 | not rejected          |
| 17346 H | AO16-9-PC1     | 3       | 62 - 64       | 2.415          | C. wuellerstorfi | 4        | 0.626 | 0.413 | not rejected          |
| 17346 I | AO16-9-PC1     | 3       | 62 - 64       | 2.415          | C. wuellerstorfi | 4        | 0.341 | 0.147 | not rejected          |
| 17346 J | AO16-9-PC1     | 3       | 62 - 64       | 2.415          | C. wuellerstorfi | 4        | 0.581 | 0.382 | not rejected          |
| 21406 A | LOMROG12-TWC03 | TWC     | 12-14         | 0.095          | N. pachyderma    | 10       | 0.190 | 0.071 | not rejected          |
| 21406 B | LOMROG12-TWC03 | TWC     | 12-14         | 0.095          | N. pachyderma    | 10       | 0.204 | 0.080 | not rejected          |

| UAL      | Core           | Section | Interval (cm) | Core depth (m) | Genus/sp.     | *n tests | DLAsp | DLGlu | **Rejection criterion |
|----------|----------------|---------|---------------|----------------|---------------|----------|-------|-------|-----------------------|
| 21406 C  | LOMROG12-TWC03 | TWC     | 12-14         | 0.095          | N. pachyderma | 10       | 0.183 | 0.070 | not rejected          |
| 21406 D  | LOMROG12-TWC03 | TWC     | 12-14         | 0.095          | N. pachyderma | 10       | 0.180 | 0.069 | not rejected          |
| 21406 E  | LOMROG12-TWC03 | TWC     | 12-14         | 0.095          | N. pachyderma | 10       | 0.226 | 0.067 | 2                     |
| 21406 G  | LOMROG12-TWC03 | TWC     | 12-14         | 0.095          | N. pachyderma | 10       | 0.222 | 0.096 | not rejected          |
| 21406 H  | LOMROG12-TWC03 | TWC     | 12-14         | 0.095          | N. pachyderma | 10       | 0.180 | 0.076 | not rejected          |
| 21407 A  | LOMROG12-TWC03 | TWC     | 52-54         | 0.495          | N. pachyderma | 10       | 0.352 | 0.195 | not rejected          |
| 21407 B  | LOMROG12-TWC03 | TWC     | 52-54         | 0.495          | N. pachyderma | 10       | 0.319 | 0.160 | not rejected          |
| 21407 C  | LOMROG12-TWC03 | TWC     | 52-54         | 0.495          | N. pachyderma | 10       | 0.322 | 0.155 | not rejected          |
| 21407 D  | LOMROG12-TWC03 | TWC     | 52-54         | 0.495          | N. pachyderma | 10       | 0.345 | 0.180 | not rejected          |
| 21407 E  | LOMROG12-TWC03 | TWC     | 52-54         | 0.495          | N. pachyderma | 10       | 0.311 | 0.134 | not rejected          |
| 21407 F  | LOMROG12-TWC03 | TWC     | 52-54         | 0.495          | N. pachyderma | 10       | 0.345 | 0.182 | not rejected          |
| 21407 H  | LOMROG12-TWC03 | TWC     | 52-54         | 0.495          | N. pachyderma | 10       | 0.042 | 0.022 | 1                     |
| 21408 A  | LOMROG12-PC03  | 1       | 57-60         | 0.505          | N. pachyderma | 10       | 0.363 | 0.181 | not rejected          |
| 21408 B  | LOMROG12-PC03  | 1       | 57-60         | 0.505          | N. pachyderma | 10       | 0.262 | 0.074 | 1                     |
| 21408 C  | LOMROG12-PC03  | 1       | 57-60         | 0.505          | N. pachyderma | 10       | 0.295 | 0.122 | not rejected          |
| 21408 D  | LOMROG12-PC03  | 1       | 57-60         | 0.505          | N. pachyderma | 10       | 0.234 | 0.077 | 1                     |
| 21408 E  | LOMROG12-PC03  | 1       | 57-60         | 0.505          | N. pachyderma | 10       | 0.352 | 0.140 | not rejected          |
| 21408 F  | LOMROG12-PC03  | 1       | 57-60         | 0.505          | N. pachyderma | 10       | 0.318 | 0.177 | not rejected          |
| 21408 G  | LOMROG12-PC03  | 1       | 57-60         | 0.505          | N. pachyderma | 10       | 0.330 | 0.169 | not rejected          |
| 21408 H  | LOMROG12-PC03  | 1       | 57-60         | 0.505          | N. pachyderma | 10       | 0.382 | 0.190 | not rejected          |
| 21409 A  | LOMROG12-PC03  | 1       | 68-70         | 0.61           | N. pachyderma | 10       | 0.370 | 0.196 | not rejected          |
| 21409 B  | LOMROG12-PC03  | 1       | 68-70         | 0.61           | N. pachyderma | 10       | 0.375 | 0.196 | not rejected          |
| 21409 C  | LOMROG12-PC03  | 1       | 68-70         | 0.61           | N. pachyderma | 10       | 0.427 | 0.235 | not rejected          |
| 21409 D* | LOMROG12-PC03  | 1       | 68-70         | 0.61           | N. pachyderma | 10       | 0.220 | 0.062 | 1                     |
| 21409 E  | LOMROG12-PC03  | 1       | 68-70         | 0.61           | N. pachyderma | 10       | 0.386 | 0.198 | not rejected          |
| 21409 F  | LOMROG12-PC03  | 1       | 68-70         | 0.61           | N. pachyderma | 10       | 0.400 | 0.206 | not rejected          |
| 21409 G  | LOMROG12-PC03  | 1       | 68-70         | 0.61           | N. pachyderma | 10       | 0.388 | 0.193 | not rejected          |
| 21409 H  | LOMROG12-PC03  | 1       | 68-70         | 0.61           | N. pachyderma | 10       | 0.415 | 0.215 | not rejected          |
| 21410 A  | LOMROG12-PC03  | 2       | 2-4           | 0.761          | N. pachyderma | 10       | 0.444 | 0.249 | not rejected          |
| 21410 B  | LOMROG12-PC03  | 2       | 2-4           | 0.761          | N. pachyderma | 10       | 0.354 | 0.204 | not rejected          |
| 21410 C  | LOMROG12-PC03  | 2       | 2-4           | 0.761          | N. pachyderma | 10       | 0.424 | 0.191 | not rejected          |
| 21410 D  | LOMROG12-PC03  | 2       | 2-4           | 0.761          | N. pachyderma | 10       | 0.228 | 0.071 | 1                     |
| 21410 E  | LOMROG12-PC03  | 2       | 2-4           | 0.761          | N. pachyderma | 10       | 0.102 | 0.045 | 1                     |
| 21410 F  | LOMROG12-PC03  | 2       | 2-4           | 0.761          | N. pachyderma | 10       | 0.454 | 0.226 | not rejected          |
| 21410 G  | LOMROG12-PC03  | 2       | 2-4           | 0.761          | N. pachyderma | 10       | 0.397 | 0.189 | not rejected          |
| 21410 H  | LOMROG12-PC03  | 2       | 2-4           | 0.761          | N. pachyderma | 10       | 0.168 | 0.058 | 1                     |
| 21411 A  | LOMROG12-PC03  | 2       | 55-57         | 1.291          | N. pachyderma | 10       | 0.463 | 0.233 | not rejected          |
| 21411 B  | LOMROG12-PC03  | 2       | 55-57         | 1.291          | N. pachyderma | 10       | 0.335 | 0.179 | 1                     |
| 21411 C  | LOMROG12-PC03  | 2       | 55-57         | 1.291          | N. pachyderma | 10       | 0.479 | 0.257 | not rejected          |
| 21411 D  | LOMROG12-PC03  | 2       | 55-57         | 1.291          | N. pachyderma | 10       | 0.481 | 0.240 | not rejected          |
| 21411 E  | LOMROG12-PC03  | 2       | 55-57         | 1.291          | N. pachyderma | 10       | 0.483 | 0.244 | not rejected          |
| 21411 F  | LOMROG12-PC03  | 2       | 55-57         | 1.291          | N. pachyderma | 10       | 0.458 | 0.232 | not rejected          |
| 21411 G  | LOMROG12-PC03  | 2       | 55-57         | 1.291          | N. pachyderma | 10       | 0.490 | 0.290 | 3                     |
| 21411 H  | LOMROG12-PC03  | 2       | 55-57         | 1.291          | N. pachyderma | 10       | 0.444 | 0.234 | not rejected          |
| 21412 A  | LOMROG12-PC03  | 2       | 66-68         | 1.401          | N. pachyderma | 10       | 0.469 | 0.269 | not rejected          |
| 21412 C  | LOMROG12-PC03  | 2       | 66-68         | 1.401          | N. pachyderma | 10       | 0.312 | 0.106 | 1                     |
| 21412 E  | LOMROG12-PC03  | 2       | 66-68         | 1.401          | N. pachyderma | 10       | 0.431 | 0.229 | not rejected          |
| 21412 F  | LOMROG12-PC03  | 2       | 66-68         | 1.401          | N. pachyderma | 10       | 0.451 | 0.250 | not rejected          |
| 21412 G  | LOMROG12-PC03  | 2       | 66-68         | 1.401          | N. pachyderma | 10       | 0.292 | 0.132 | 3                     |
| 21412 H  | LOMROG12-PC03  | 2       | 66-68         | 1.401          | N. pachyderma | 10       | 0.422 | 0.208 | not rejected          |
| 21413 A  | LOMROG12-PC03  | 2       | 81-83         | 1.551          | N. pachyderma | 10       | 0.492 | 0.267 | not rejected          |
| 21413 B  | LOMROG12-PC03  | 2       | 81-83         | 1.551          | N. pachyderma | 10       | 0.529 | 0.319 | not rejected          |
| 21413 D  | LOMROG12-PC03  | 2       | 81-83         | 1.551          | N. pachyderma | 10       | 0.470 | 0.232 | not rejected          |
| 21413 F  | LOMROG12-PC03  | 2       | 81-83         | 1.551          | N. pachyderma | 8        | 0.146 | 0.052 | 1                     |
| 21413 G  | LOMROG12-PC03  | 2       | 81-83         | 1.551          | N. pachyderma | 8        | 0.374 | 0.151 | not rejected          |
| 21413 H  | LOMROG12-PC03  | 2       | 81-83         | 1.551          | N. pachyderma | 8        | 0.095 | 0.028 | 1                     |
| 21414 A  | LOMROG12-PC03  | 2       | 86-88         | 1.601          | N. pachyderma | 10       | 0.126 | 0.031 | 1                     |
| 21414 B  | LOMROG12-PC03  | 2       | 86-88         | 1.601          | N. pachyderma | 10       | 0.374 | 0.162 | not rejected          |
| 21414 C  | LOMROG12-PC03  | 2       | 86-88         | 1.601          | N. pachyderma | 8        | 0.457 | 0.211 | not rejected          |
| 21414 E  | LOMROG12-PC03  | 2       | 86-88         | 1.601          | N. pachyderma | 8        | 0.403 | 0.162 | not rejected          |
| 21414 F  | LOMROG12-PC03  | 2       | 86-88         | 1.601          | N. pachyderma | 8        | 0.413 | 0.175 | not rejected          |
| 21414 G  | LOMROG12-PC03  | 2       | 86-88         | 1.601          | N. pachyderma | 8        | 0.439 | 0.214 | not rejected          |
| 21414 H  | LOMROG12-PC03  | 2       | 86-88         | 1.601          | N. pachyderma | 8        | 0.190 | 0.051 | 1                     |
| 21414 I  | LOMROG12-PC03  | 2       | 86-88         | 1.601          | N. pachyderma | 10       | 0.374 | 0.142 | 2                     |
| 21415 A  | LOMROG12-PC03  | 2       | 104-106       | 1.781          | N. pachyderma | 10       | 0.338 | 0.181 | not rejected          |

| UAL     | Core          | Section | Interval (cm) | Core depth (m) | Genus/sp.     | *n tests | DLAsp | DLGlu | **Rejection criterion |
|---------|---------------|---------|---------------|----------------|---------------|----------|-------|-------|-----------------------|
| 21415 B | LOMROG12-PC03 | 2       | 104-106       | 1.781          | N. pachyderma | 10       | 0.422 | 0.244 | not rejected          |
| 21415 C | LOMROG12-PC03 | 2       | 104-106       | 1.781          | N. pachyderma | 10       | 0.324 | 0.126 | not rejected          |
| 21415 D | LOMROG12-PC03 | 2       | 104-106       | 1.781          | N. pachyderma | 10       | 0.459 | 0.235 | not rejected          |
| 21415 E | LOMROG12-PC03 | 2       | 104-106       | 1.781          | N. pachyderma | 8        | 0.340 | 0.172 | not rejected          |
| 21416 A | LOMROG12-PC03 | 2       | 136-138       | 2.101          | N. pachyderma | 8        | 0.330 | 0.123 | 1                     |
| 21416 B | LOMROG12-PC03 | 2       | 136-138       | 2.101          | N. pachyderma | 8        | 0.405 | 0.231 | not rejected          |
| 21416 C | LOMROG12-PC03 | 2       | 136-138       | 2.101          | N. pachyderma | 8        | 0.421 | 0.230 | not rejected          |
| 21416 D | LOMROG12-PC03 | 2       | 136-138       | 2.101          | N. pachyderma | 8        | 0.270 | 0.097 | 1                     |
| 21416 F | LOMROG12-PC03 | 2       | 136-138       | 2.101          | N. pachyderma | 8        | 0.264 | 0.089 | 2                     |
| 21416 G | LOMROG12-PC03 | 2       | 136-138       | 2.101          | N. pachyderma | 8        | 0.240 | 0.075 | 1                     |
| 21416 H | LOMROG12-PC03 | 2       | 136-138       | 2.101          | N. pachyderma | 8        | 0.244 | 0.075 | 1                     |
| 21416 I | LOMROG12-PC03 | 2       | 136-138       | 2.101          | N. pachyderma | 8        | 0.350 | 0.161 | not rejected          |
| 21587 A | LOMROG07-PC04 | -       | 3-5           | 0.04           | N. pachyderma | 10       | 0.097 | 0.039 | not rejected          |
| 21587 B | LOMROG07-PC04 | -       | 3-5           | 0.04           | N. pachyderma | 10       | 0.098 | 0.036 | not rejected          |
| 21587 C | LOMROG07-PC04 | -       | 3-5           | 0.04           | N. pachyderma | 10       | 0.095 | 0.030 | not rejected          |
| 21587 D | LOMROG07-PC04 | -       | 3-5           | 0.04           | N. pachyderma | 10       | 0.105 | 0.039 | not rejected          |
| 21587 E | LOMROG07-PC04 | -       | 3-5           | 0.04           | N. pachyderma | 10       | 0.087 | 0.034 | not rejected          |
| 21587 F | LOMROG07-PC04 | -       | 3-5           | 0.04           | N. pachyderma | 10       | 0.089 | 0.025 | 1                     |
| 21587 G | LOMROG07-PC04 | -       | 3-5           | 0.04           | N. pachyderma | 10       | 0.051 | 0.017 | 1                     |
| 21587 H | LOMROG07-PC04 | -       | 3-5           | 0.04           | N. pachyderma | 10       | 0.149 | 0.052 | 3                     |
| 21588 A | LOMROG07-PC04 | -       | 13-15         | 0.14           | N. pachyderma | 10       | 0.330 | 0.137 | not rejected          |
| 21588 B | LOMROG07-PC04 | -       | 13-15         | 0.14           | N. pachyderma | 10       | 0.203 | 0.054 | 1                     |
| 21588 C | LOMROG07-PC04 | -       | 13-15         | 0.14           | N. pachyderma | 10       | 0.371 | 0.218 | 3                     |
| 21588 D | LOMROG07-PC04 | -       | 13-15         | 0.14           | N. pachyderma | 10       | 0.251 | 0.096 | not rejected          |
| 21588 E | LOMROG07-PC04 | -       | 13-15         | 0.14           | N. pachyderma | 10       | 0.253 | 0.098 | not rejected          |
| 21588 F | LOMROG07-PC04 | -       | 13-15         | 0.14           | N. pachyderma | 10       | 0.260 | 0.103 | not rejected          |
| 21588 G | LOMROG07-PC04 | -       | 13-15         | 0.14           | N. pachyderma | 10       | 0.297 | 0.138 | not rejected          |
| 21588 H | LOMROG07-PC04 | -       | 13-15         | 0.14           | N. pachyderma | 10       | 0.208 | 0.115 | 1                     |
| 21589 A | LOMROG07-PC04 | -       | 110-112       | 1.11           | N. pachyderma | 10       | 0.359 | 0.150 | not rejected          |
| 21589 B | LOMROG07-PC04 | -       | 110-112       | 1.11           | N. pachyderma | 10       | 0.305 | 0.115 | not rejected          |
| 21589 C | LOMROG07-PC04 | -       | 110-112       | 1.11           | N. pachyderma | 10       | 0.355 | 0.157 | not rejected          |
| 21589 D | LOMROG07-PC04 | -       | 110-112       | 1.11           | N. pachyderma | 10       | 0.157 | 0.046 | 1                     |
| 21589 E | LOMROG07-PC04 | -       | 110-112       | 1.11           | N. pachyderma | 10       | 0.369 | 0.164 | not rejected          |
| 21589 F | LOMROG07-PC04 | -       | 110-112       | 1.11           | N. pachyderma | 10       | 0.275 | 0.099 | 2                     |
| 21589 G | LOMROG07-PC04 | -       | 110-112       | 1.11           | N. pachyderma | 10       | 0.266 | 0.077 | 1                     |
| 21589 H | LOMROG07-PC04 | -       | 110-112       | 1.11           | N. pachyderma | 10       | 0.234 | 0.077 | 1                     |
| 21590 A | LOMROG07-PC04 | -       | 140-142       | 1.41           | N. pachyderma | 10       | 0.374 | 0.181 | not rejected          |
| 21590 B | LOMROG07-PC04 | -       | 140-142       | 1.41           | N. pachyderma | 10       | 0.329 | 0.170 | not rejected          |
| 21590 C | LOMROG07-PC04 | -       | 140-142       | 1.41           | N. pachyderma | 10       | 0.304 | 0.112 | not rejected          |
| 21590 D | LOMROG07-PC04 | -       | 140-142       | 1.41           | N. pachyderma | 10       | 0.243 | 0.076 | 1                     |
| 21590 E | LOMROG07-PC04 | -       | 140-142       | 1.41           | N. pachyderma | 10       | 0.066 | 0.016 | 1                     |
| 21590 F | LOMROG07-PC04 | -       | 140-142       | 1.41           | N. pachyderma | 10       | 0.294 | 0.116 | not rejected          |
| 21590 G | LOMROG07-PC04 | -       | 140-142       | 1.41           | N. pachyderma | 10       | 0.233 | 0.062 | 1                     |
| 21590 H | LOMROG07-PC04 | -       | 140-142       | 1.41           | N. pachyderma | 10       | 0.289 | 0.107 | not rejected          |
| 21591 A | LOMROG07-PC04 | -       | 171-173       | 1.72           | N. pachyderma | 10       | 0.317 | 0.111 | 1                     |
| 21591 B | LOMROG07-PC04 | -       | 171-173       | 1.72           | N. pachyderma | 10       | 0.448 | 0.250 | not rejected          |
| 21591 C | LOMROG07-PC04 | -       | 171-173       | 1.72           | N. pachyderma | 10       | 0.358 | 0.152 | not rejected          |
| 21591 D | LOMROG07-PC04 | -       | 171-173       | 1.72           | N. pachyderma | 10       | 0.394 | 0.162 | not rejected          |
| 21591 E | LOMROG07-PC04 | -       | 171-173       | 1.72           | N. pachyderma | 10       | 0.361 | 0.146 | not rejected          |
| 21591 F | LOMROG07-PC04 | -       | 171-173       | 1.72           | N. pachyderma | 10       | 0.271 | 0.092 | 1                     |
| 21591 G | LOMROG07-PC04 | -       | 171-173       | 1.72           | N. pachyderma | 10       | 0.149 | 0.043 | 1                     |
| 21591 H | LOMROG07-PC04 | -       | 171-173       | 1.72           | N. pachyderma | 10       | 0.394 | 0.164 | not rejected          |
| 21592 A | LOMROG07-PC04 | -       | 200-202       | 2.01           | N. pachyderma | 8        | 0.069 | 0.023 | 1                     |
| 21592 B | LOMROG07-PC04 | -       | 200-202       | 2.01           | N. pachyderma | 8        | 0.341 | 0.124 | 2                     |
| 21592 C | LOMROG07-PC04 | -       | 200-202       | 2.01           | N. pachyderma | 8        | 0.148 | 0.042 | 1                     |
| 21592 D | LOMROG07-PC04 | -       | 200-202       | 2.01           | N. pachyderma | 8        | 0.255 | 0.097 | 1                     |
| 21592 E | LOMROG07-PC04 | -       | 200-202       | 2.01           | N. pachyderma | 8        | 0.234 | 0.073 | 1                     |
| 21592 F | LOMROG07-PC04 | -       | 200-202       | 2.01           | N. pachyderma | 8        | 0.259 | 0.090 | 1                     |
| 21592 G | LOMROG07-PC04 | -       | 200-202       | 2.01           | N. pachyderma | 8        | 0.357 | 0.140 | not rejected          |
| 21592 H | LOMROG07-PC04 | -       | 200-202       | 2.01           | N. pachyderma | 8        | 0.230 | 0.086 | 1                     |
| 21594 B | LOMROG07-PC04 | -       | 299-301       | 3              | N. pachyderma | 8        | 0.186 | 0.089 | not rejected          |
| 21594 C | LOMROG07-PC04 | -       | 299-301       | 3              | N. pachyderma | 8        | 0.379 | 0.199 | not rejected          |
| 21594 D | LOMROG07-PC04 | -       | 299-301       | 3              | N. pachyderma | 8        | 0.245 | 0.119 | not rejected          |
| 21594 E | LOMROG07-PC04 | -       | 299-301       | 3              | N. pachyderma | 8        | 0.195 | 0.070 | 1                     |
| 21594 F | LOMROG07-PC04 | -       | 299-301       | 3              | N. pachyderma | 8        | 0.234 | 0.084 | 1                     |



| UAL     | Core          | Section | Interval (cm) | Core depth (m) | Genus/sp.        | *n tests | DLAsp | DLGlu | **Rejection criterion |
|---------|---------------|---------|---------------|----------------|------------------|----------|-------|-------|-----------------------|
| 21594 G | LOMROG07-PC04 | -       | 299-301       | 3              | N. pachyderma    | 8        | 0.061 | 0.021 | 1                     |
| 21594 H | LOMROG07-PC04 | -       | 299-301       | 3              | N. pachyderma    | 8        | 0.219 | 0.087 | 1                     |
| 22724 A | PS17 / 1906-2 | -       | 15            | 0.15           | C. wuellerstorfi | 2        | 0.164 | 0.060 | not rejected          |
| 22724 B | PS17 / 1906-2 | -       | 15            | 0.15           | C. wuellerstorfi | 2        | 0.172 | 0.061 | not rejected          |
| 22724 C | PS17 / 1906-2 | -       | 15            | 0.15           | C. wuellerstorfi | 3        | 0.184 | 0.060 | not rejected          |
| 22724 D | PS17 / 1906-2 | -       | 15            | 0.15           | C. wuellerstorfi | 3        | 0.191 | 0.064 | not rejected          |
| 22724 E | PS17 / 1906-2 | -       | 15            | 0.15           | C. wuellerstorfi | 3        | 0.186 | 0.059 | not rejected          |
| 22724 F | PS17 / 1906-2 | -       | 15            | 0.15           | C. wuellerstorfi | 3        | 0.172 | 0.062 | not rejected          |
| 22724 G | PS17 / 1906-2 | -       | 15            | 0.15           | C. wuellerstorfi | 3        | 0.170 | 0.052 | not rejected          |
| 22724 H | PS17 / 1906-2 | -       | 15            | 0.15           | C. wuellerstorfi | 3        | 0.159 | 0.059 | not rejected          |
| 22724 I | PS17 / 1906-2 | -       | 15            | 0.15           | C. wuellerstorfi | 3        | 0.174 | 0.052 | not rejected          |
| 22724 J | PS17 / 1906-2 | -       | 15            | 0.15           | C. wuellerstorfi | 3        | 0.163 | 0.067 | not rejected          |
| 22724 K | PS17 / 1906-2 | -       | 15            | 0.15           | C. wuellerstorfi | 3        | 0.178 | 0.059 | not rejected          |
| 22724 L | PS17 / 1906-2 | -       | 15            | 0.15           | C. wuellerstorfi | 3        | 0.185 | 0.063 | not rejected          |
| 22724 M | PS17 / 1906-2 | -       | 15            | 0.15           | C. wuellerstorfi | 3        | 0.173 | 0.062 | not rejected          |
| 22724 N | PS17 / 1906-2 | -       | 15            | 0.15           | C. wuellerstorfi | 4        | 0.173 | 0.054 | not rejected          |
| 22724 O | PS17 / 1906-2 | -       | 15            | 0.15           | C. wuellerstorfi | 5        | 0.176 | 0.059 | not rejected          |
| 22725 A | PS17 / 1906-2 | -       | 180.5         | 1.805          | C. wuellerstorfi | 2        | 0.318 | 0.144 | not rejected          |
| 22725 B | PS17 / 1906-2 | -       | 180.5         | 1.805          | C. wuellerstorfi | 2        | 0.336 | 0.142 | not rejected          |
| 22725 C | PS17 / 1906-2 | -       | 180.5         | 1.805          | C. wuellerstorfi | 2        | 0.287 | 0.121 | 3                     |
| 22725 D | PS17 / 1906-2 | -       | 180.5         | 1.805          | C. wuellerstorfi | 2        | 0.340 | 0.139 | not rejected          |
| 22725 E | PS17 / 1906-2 | -       | 180.5         | 1.805          | C. wuellerstorfi | 2        | 0.328 | 0.149 | not rejected          |
| 22725 F | PS17 / 1906-2 | -       | 180.5         | 1.805          | C. wuellerstorfi | 2        | 0.333 | 0.141 | not rejected          |
| 22725 G | PS17 / 1906-2 | -       | 180.5         | 1.805          | C. wuellerstorfi | 3        | 0.326 | 0.143 | not rejected          |
| 22725 I | PS17 / 1906-2 | -       | 180.5         | 1.805          | C. wuellerstorfi | 3        | 0.330 | 0.137 | not rejected          |
| 22725 J | PS17 / 1906-2 | -       | 180.5         | 1.805          | C. wuellerstorfi | 3        | 0.309 | 0.163 | not rejected          |
| 22725 K | PS17 / 1906-2 | -       | 180.5         | 1.805          | C. wuellerstorfi | 3        | 0.354 | 0.169 | 3                     |
| 22725 L | PS17 / 1906-2 | -       | 180.5         | 1.805          | C. wuellerstorfi | 3        | 0.342 | 0.142 | not rejected          |
| 22725 M | PS17 / 1906-2 | -       | 180.5         | 1.805          | C. wuellerstorfi | 3        | 0.329 | 0.149 | not rejected          |
| 22725 N | PS17 / 1906-2 | -       | 180.5         | 1.805          | C. wuellerstorfi | 3        | 0.312 | 0.142 | not rejected          |
| 22725 P | PS17 / 1906-2 | -       | 180.5         | 1.805          | C. wuellerstorfi | 3        | 0.333 | 0.150 | not rejected          |
| 22725 Q | PS17 / 1906-2 | -       | 180.5         | 1.805          | C. wuellerstorfi | 4        | 0.329 | 0.136 | not rejected          |
| 22725 R | PS17 / 1906-2 | -       | 180.5         | 1.805          | C. wuellerstorfi | 4        | 0.312 | 0.138 | not rejected          |
| 22725 S | PS17 / 1906-2 | -       | 180.5         | 1.805          | C. wuellerstorfi | 4        | 0.335 | 0.142 | not rejected          |
| 22725 T | PS17 / 1906-2 | -       | 180.5         | 1.805          | C. wuellerstorfi | 4        | 0.308 | 0.117 | 3                     |
| 22726 A | PS17 / 1906-2 | -       | 200.5         | 2.005          | C. wuellerstorfi | 2        | 0.376 | 0.172 | not rejected          |
| 22726 B | PS17 / 1906-2 | -       | 200.5         | 2.005          | C. wuellerstorfi | 2        | 0.383 | 0.167 | not rejected          |
| 22726 C | PS17 / 1906-2 | -       | 200.5         | 2.005          | C. wuellerstorfi | 2        | 0.336 | 0.156 | not rejected          |
| 22726 D | PS17 / 1906-2 | -       | 200.5         | 2.005          | C. wuellerstorfi | 2        | 0.348 | 0.156 | not rejected          |
| 22726 E | PS17 / 1906-2 | -       | 200.5         | 2.005          | C. wuellerstorfi | 3        | 0.357 | 0.168 | not rejected          |
| 22726 F | PS17 / 1906-2 | -       | 200.5         | 2.005          | C. wuellerstorfi | 3        | 0.362 | 0.158 | not rejected          |
| 22726 G | PS17 / 1906-2 | -       | 200.5         | 2.005          | C. wuellerstorfi | 3        | 0.363 | 0.165 | not rejected          |
| 22726 H | PS17 / 1906-2 | -       | 200.5         | 2.005          | C. wuellerstorfi | 2        | 0.362 | 0.161 | not rejected          |
| 22726 I | PS17 / 1906-2 | -       | 200.5         | 2.005          | C. wuellerstorfi | 2        | 0.361 | 0.147 | not rejected          |
| 22726 J | PS17 / 1906-2 | -       | 200.5         | 2.005          | C. wuellerstorfi | 2        | 0.335 | 0.151 | not rejected          |
| 22726 K | PS17 / 1906-2 | -       | 200.5         | 2.005          | C. wuellerstorfi | 3        | 0.347 | 0.129 | 2                     |
| 22726 L | PS17 / 1906-2 | -       | 200.5         | 2.005          | C. wuellerstorfi | 3        | 0.351 | 0.158 | not rejected          |
| 22726 M | PS17 / 1906-2 | -       | 200.5         | 2.005          | C. wuellerstorfi | 3        | 0.352 | 0.167 | not rejected          |
| 22726 N | PS17 / 1906-2 | -       | 200.5         | 2.005          | C. wuellerstorfi | 3        | 0.327 | 0.159 | not rejected          |
| 22726 O | PS17 / 1906-2 | -       | 200.5         | 2.005          | C. wuellerstorfi | 3        | 0.360 | 0.162 | not rejected          |
| 22726 P | PS17 / 1906-2 | -       | 200.5         | 2.005          | C. wuellerstorfi | 3        | 0.340 | 0.162 | not rejected          |
| 22726 Q | PS17 / 1906-2 | -       | 200.5         | 2.005          | C. wuellerstorfi | 4        | 0.366 | 0.164 | not rejected          |
| 22726 R | PS17 / 1906-2 | -       | 200.5         | 2.005          | C. wuellerstorfi | 4        | 0.335 | 0.149 | not rejected          |
| 22726 S | PS17 / 1906-2 | -       | 200.5         | 2.005          | C. wuellerstorfi | 4        | 0.330 | 0.156 | not rejected          |
| 22726 T | PS17 / 1906-2 | -       | 200.5         | 2.005          | C. wuellerstorfi | 5        | 0.337 | 0.170 | not rejected          |
| 22727 A | PS17 / 1906-2 | -       | 210.5         | 2.105          | C. wuellerstorfi | 2        | 0.355 | 0.168 | not rejected          |
| 22727 B | PS17 / 1906-2 | -       | 210.5         | 2.105          | C. wuellerstorfi | 2        | 0.368 | 0.182 | not rejected          |
| 22727 C | PS17 / 1906-2 | -       | 210.5         | 2.105          | C. wuellerstorfi | 3        | 0.353 | 0.173 | not rejected          |
| 22727 D | PS17 / 1906-2 | -       | 210.5         | 2.105          | C. wuellerstorfi | 3        | 0.356 | 0.173 | not rejected          |
| 22727 E | PS17 / 1906-2 | -       | 210.5         | 2.105          | C. wuellerstorfi | 3        | 0.347 | 0.170 | not rejected          |
| 22727 F | PS17 / 1906-2 | -       | 210.5         | 2.105          | C. wuellerstorfi | 3        | 0.347 | 0.167 | not rejected          |
| 22727 G | PS17 / 1906-2 | -       | 210.5         | 2.105          | C. wuellerstorfi | 3        | 0.343 | 0.176 | not rejected          |
| 22727 H | PS17 / 1906-2 | -       | 210.5         | 2.105          | C. wuellerstorfi | 3        | 0.368 | 0.173 | not rejected          |
| 22727 I | PS17 / 1906-2 | -       | 210.5         | 2.105          | C. wuellerstorfi | 3        | 0.364 | 0.163 | not rejected          |
| 22727 J | PS17 / 1906-2 | -       | 210.5         | 2.105          | C. wuellerstorfi | 3        | 0.352 | 0.170 | not rejected          |

| UAL     | Core          | Section | Interval (cm) | Core depth (m) | Genus/sp.        | *n tests | DLAsp | DLGlu | **Rejection criterion |
|---------|---------------|---------|---------------|----------------|------------------|----------|-------|-------|-----------------------|
| 22727 K | PS17 / 1906-2 | -       | 210.5         | 2.105          | C. wuellerstorfi | 3        | 0.366 | 0.166 | not rejected          |
| 22727 L | PS17 / 1906-2 | -       | 210.5         | 2.105          | C. wuellerstorfi | 3        | 0.354 | 0.177 | not rejected          |
| 22727 M | PS17 / 1906-2 | -       | 210.5         | 2.105          | C. wuellerstorfi | 4        | 0.365 | 0.179 | not rejected          |
| 22727 N | PS17 / 1906-2 | -       | 210.5         | 2.105          | C. wuellerstorfi | 4        | 0.373 | 0.175 | not rejected          |
| 22727 O | PS17 / 1906-2 | -       | 210.5         | 2.105          | C. wuellerstorfi | 4        | 0.360 | 0.179 | not rejected          |
| 22727 P | PS17 / 1906-2 | -       | 210.5         | 2.105          | C. wuellerstorfi | 4        | 0.350 | 0.162 | not rejected          |
| 22727 Q | PS17 / 1906-2 | -       | 210.5         | 2.105          | C. wuellerstorfi | 4        | 0.353 | 0.154 | not rejected          |
| 22727 R | PS17 / 1906-2 | -       | 210.5         | 2.105          | C. wuellerstorfi | 5        | 0.328 | 0.153 | 3                     |
| 22728 A | PS17 / 1906-2 | -       | 220.5         | 2.205          | C. wuellerstorfi | 2        | 0.395 | 0.192 | not rejected          |
| 22728 B | PS17 / 1906-2 | -       | 220.5         | 2.205          | C. wuellerstorfi | 2        | 0.409 | 0.227 | 3                     |
| 22728 C | PS17 / 1906-2 | -       | 220.5         | 2.205          | C. wuellerstorfi | 2        | 0.393 | 0.197 | not rejected          |
| 22728 D | PS17 / 1906-2 | -       | 220.5         | 2.205          | C. wuellerstorfi | 2        | 0.374 | 0.193 | not rejected          |
| 22728 E | PS17 / 1906-2 | -       | 220.5         | 2.205          | C. wuellerstorfi | 2        | 0.403 | 0.208 | not rejected          |
| 22728 F | PS17 / 1906-2 | -       | 220.5         | 2.205          | C. wuellerstorfi | 2        | 0.376 | 0.201 | not rejected          |
| 22728 G | PS17 / 1906-2 | -       | 220.5         | 2.205          | C. wuellerstorfi | 3        | 0.389 | 0.210 | not rejected          |
| 22728 H | PS17 / 1906-2 | -       | 220.5         | 2.205          | C. wuellerstorfi | 3        | 0.361 | 0.175 | not rejected          |
| 22728 I | PS17 / 1906-2 | -       | 220.5         | 2.205          | C. wuellerstorfi | 3        | 0.386 | 0.195 | not rejected          |
| 22728 J | PS17 / 1906-2 | -       | 220.5         | 2.205          | C. wuellerstorfi | 3        | 0.384 | 0.206 | not rejected          |
| 22728 K | PS17 / 1906-2 | -       | 220.5         | 2.205          | C. wuellerstorfi | 4        | 0.391 | 0.202 | not rejected          |
| 22728 L | PS17 / 1906-2 | -       | 220.5         | 2.205          | C. wuellerstorfi | 4        | 0.374 | 0.186 | not rejected          |
| 22728 M | PS17 / 1906-2 | -       | 220.5         | 2.205          | C. wuellerstorfi | 3        | 0.366 | 0.193 | not rejected          |
| 22728 N | PS17 / 1906-2 | -       | 220.5         | 2.205          | C. wuellerstorfi | 3        | 0.359 | 0.185 | not rejected          |
| 22728 O | PS17 / 1906-2 | -       | 220.5         | 2.205          | C. wuellerstorfi | 3        | 0.400 | 0.211 | not rejected          |
| 22728 P | PS17 / 1906-2 | -       | 220.5         | 2.205          | C. wuellerstorfi | 3        | 0.351 | 0.160 | not rejected          |
| 22728 Q | PS17 / 1906-2 | -       | 220.5         | 2.205          | C. wuellerstorfi | 3        | 0.364 | 0.182 | not rejected          |
| 22728 R | PS17 / 1906-2 | -       | 220.5         | 2.205          | C. wuellerstorfi | 3        | 0.375 | 0.168 | not rejected          |
| 22728 S | PS17 / 1906-2 | -       | 220.5         | 2.205          | C. wuellerstorfi | 4        | 0.356 | 0.164 | not rejected          |
| 22728 T | PS17 / 1906-2 | -       | 220.5         | 2.205          | C. wuellerstorfi | 4        | 0.388 | 0.190 | not rejected          |
| 22728 U | PS17 / 1906-2 | -       | 220.5         | 2.205          | C. wuellerstorfi | 4        | 0.401 | 0.194 | not rejected          |
| 22729 A | PS17 / 1906-2 | -       | 329           | 3.29           | C. wuellerstorfi | 2        | 0.479 | 0.281 | not rejected          |
| 22729 B | PS17 / 1906-2 | -       | 329           | 3.29           | C. wuellerstorfi | 2        | 0.408 | 0.205 | not rejected          |
| 22729 C | PS17 / 1906-2 | -       | 329           | 3.29           | C. wuellerstorfi | 3        | 0.383 | 0.243 | 2                     |
| 22729 D | PS17 / 1906-2 | -       | 329           | 3.29           | C. wuellerstorfi | 3        | 0.505 | 0.334 | not rejected          |
| 22729 E | PS17 / 1906-2 | -       | 329           | 3.29           | C. wuellerstorfi | 3        | 0.382 | 0.201 | not rejected          |
| 22729 F | PS17 / 1906-2 | -       | 329           | 3.29           | C. wuellerstorfi | frags    | 0.441 | 0.270 | not rejected          |
| 22730 A | PS17 / 1906-2 | -       | 360.5         | 3.605          | C. wuellerstorfi | 2        | 0.359 | 0.200 | not rejected          |
| 22730 B | PS17 / 1906-2 | -       | 360.5         | 3.605          | C. wuellerstorfi | 2        | 0.348 | 0.148 | not rejected          |
| 22730 C | PS17 / 1906-2 | -       | 360.5         | 3.605          | C. wuellerstorfi | 3        | 0.317 | 0.135 | not rejected          |
| 22730 D | PS17 / 1906-2 | -       | 360.5         | 3.605          | C. wuellerstorfi | 3        | 0.346 | 0.165 | not rejected          |
| 22730 E | PS17 / 1906-2 | -       | 360.5         | 3.605          | C. wuellerstorfi | 3        | 0.348 | 0.147 | not rejected          |
| 22730 F | PS17 / 1906-2 | -       | 360.5         | 3.605          | C. wuellerstorfi | 4        | 0.342 | 0.167 | not rejected          |
| 22731 A | PS17 / 1906-2 | -       | 550.5         | 5.505          | C. wuellerstorfi | 2        | 0.484 | 0.292 | not rejected          |
| 22731 B | PS17 / 1906-2 | -       | 550.5         | 5.505          | C. wuellerstorfi | 2        | 0.515 | 0.319 | not rejected          |
| 22731 C | PS17 / 1906-2 | -       | 550.5         | 5.505          | C. wuellerstorfi | 3        | 0.535 | 0.360 | not rejected          |
| 22731 D | PS17 / 1906-2 | -       | 550.5         | 5.505          | C. wuellerstorfi | 3        | 0.530 | 0.359 | not rejected          |
| 22731 E | PS17 / 1906-2 | -       | 550.5         | 5.505          | C. wuellerstorfi | 3        | 0.517 | 0.333 | not rejected          |
| 22731 F | PS17 / 1906-2 | -       | 550.5         | 5.505          | C. wuellerstorfi | frags    | 0.522 | 0.322 | not rejected          |
| 22732 A | PS17 / 1906-2 | -       | 15            | 0.15           | N. pachyderma    | 12       | 0.125 | 0.062 | not rejected          |
| 22732 B | PS17 / 1906-2 | -       | 15            | 0.15           | N. pachyderma    | 12       | 0.139 | 0.066 | 3                     |
| 22732 C | PS17 / 1906-2 | -       | 15            | 0.15           | N. pachyderma    | 12       | 0.128 | 0.070 | not rejected          |
| 22732 D | PS17 / 1906-2 | -       | 15            | 0.15           | N. pachyderma    | 12       | 0.128 | 0.067 | not rejected          |
| 22732 E | PS17 / 1906-2 | -       | 15            | 0.15           | N. pachyderma    | 12       | 0.129 | 0.070 | not rejected          |
| 22732 F | PS17 / 1906-2 | -       | 15            | 0.15           | N. pachyderma    | 12       | 0.125 | 0.062 | not rejected          |
| 22732 G | PS17 / 1906-2 | -       | 15            | 0.15           | N. pachyderma    | 12       | 0.133 | 0.067 | not rejected          |
| 22732 H | PS17 / 1906-2 | -       | 15            | 0.15           | N. pachyderma    | 12       | 0.134 | 0.066 | not rejected          |
| 22732 I | PS17 / 1906-2 | -       | 15            | 0.15           | N. pachyderma    | 12       | 0.128 | 0.064 | not rejected          |
| 22732 J | PS17 / 1906-2 | -       | 15            | 0.15           | N. pachyderma    | 12       | 0.132 | 0.072 | not rejected          |
| 22732 K | PS17 / 1906-2 | -       | 15            | 0.15           | N. pachyderma    | 12       | 0.132 | 0.083 | 2                     |
| 22732 L | PS17 / 1906-2 | -       | 15            | 0.15           | N. pachyderma    | 12       | 0.107 | 0.043 | 1                     |
| 22733 A | PS17 / 1906-2 | -       | 180.5         | 1.805          | N. pachyderma    | 12       | 0.255 | 0.103 | not rejected          |
| 22733 B | PS17 / 1906-2 | -       | 180.5         | 1.805          | N. pachyderma    | 12       | 0.268 | 0.107 | not rejected          |
| 22733 C | PS17 / 1906-2 | -       | 180.5         | 1.805          | N. pachyderma    | 12       | 0.268 | 0.112 | not rejected          |
| 22733 D | PS17 / 1906-2 | -       | 180.5         | 1.805          | N. pachyderma    | 12       | 0.275 | 0.119 | not rejected          |
| 22733 E | PS17 / 1906-2 | -       | 180.5         | 1.805          | N. pachyderma    | 12       | 0.264 | 0.108 | not rejected          |
| 22733 F | PS17 / 1906-2 | -       | 180.5         | 1.805          | N. pachyderma    | 5        | 0.261 | 0.109 | not rejected          |

| UAL     | Core          | Section | Interval (cm) | Core depth (m) | Genus/sp.     | *n tests | DLAsp | DLGlu | **Rejection criterion |
|---------|---------------|---------|---------------|----------------|---------------|----------|-------|-------|-----------------------|
| 22733 G | PS17 / 1906-2 | -       | 180.5         | 1.805          | N. pachyderma | 12       | 0.251 | 0.101 | not rejected          |
| 22733 H | PS17 / 1906-2 | -       | 180.5         | 1.805          | N. pachyderma | 12       | 0.251 | 0.097 | not rejected          |
| 22733 I | PS17 / 1906-2 | -       | 180.5         | 1.805          | N. pachyderma | 12       | 0.278 | 0.124 | not rejected          |
| 22733 J | PS17 / 1906-2 | -       | 180.5         | 1.805          | N. pachyderma | 12       | 0.256 | 0.105 | not rejected          |
| 22733 K | PS17 / 1906-2 | -       | 180.5         | 1.805          | N. pachyderma | 12       | 0.257 | 0.112 | not rejected          |
| 22733 L | PS17 / 1906-2 | -       | 180.5         | 1.805          | N. pachyderma | 12       | 0.256 | 0.122 | not rejected          |
| 22733 M | PS17 / 1906-2 | -       | 180.5         | 1.805          | N. pachyderma | 12       | 0.275 | 0.122 | not rejected          |
| 22733 N | PS17 / 1906-2 | -       | 180.5         | 1.805          | N. pachyderma | 12       | 0.267 | 0.119 | not rejected          |
| 22733 O | PS17 / 1906-2 | -       | 180.5         | 1.805          | N. pachyderma | 12       | 0.260 | 0.105 | not rejected          |
| 22733 P | PS17 / 1906-2 | -       | 180.5         | 1.805          | N. pachyderma | 12       | 0.264 | 0.116 | not rejected          |
| 22733 Q | PS17 / 1906-2 | -       | 180.5         | 1.805          | N. pachyderma | 12       | 0.269 | 0.113 | not rejected          |
| 22734 A | PS17 / 1906-2 | -       | 200.5         | 2.005          | N. pachyderma | 12       | 0.299 | 0.144 | not rejected          |
| 22734 B | PS17 / 1906-2 | -       | 200.5         | 2.005          | N. pachyderma | 12       | 0.310 | 0.136 | not rejected          |
| 22734 C | PS17 / 1906-2 | -       | 200.5         | 2.005          | N. pachyderma | 12       | 0.306 | 0.141 | not rejected          |
| 22734 D | PS17 / 1906-2 | -       | 200.5         | 2.005          | N. pachyderma | 12       | 0.302 | 0.137 | not rejected          |
| 22734 E | PS17 / 1906-2 | -       | 200.5         | 2.005          | N. pachyderma | 12       | 0.304 | 0.138 | not rejected          |
| 22734 F | PS17 / 1906-2 | -       | 200.5         | 2.005          | N. pachyderma | 12       | 0.303 | 0.131 | not rejected          |
| 22734 G | PS17 / 1906-2 | -       | 200.5         | 2.005          | N. pachyderma | 12       | 0.305 | 0.135 | not rejected          |
| 22734 H | PS17 / 1906-2 | -       | 200.5         | 2.005          | N. pachyderma | 12       | 0.314 | 0.132 | not rejected          |
| 22734 I | PS17 / 1906-2 | -       | 200.5         | 2.005          | N. pachyderma | 12       | 0.317 | 0.147 | not rejected          |
| 22734 J | PS17 / 1906-2 | -       | 200.5         | 2.005          | N. pachyderma | 12       | 0.308 | 0.142 | not rejected          |
| 22734 K | PS17 / 1906-2 | -       | 200.5         | 2.005          | N. pachyderma | 12       | 0.300 | 0.136 | not rejected          |
| 22734 L | PS17 / 1906-2 | -       | 200.5         | 2.005          | N. pachyderma | 12       | 0.298 | 0.136 | not rejected          |
| 22735 A | PS17 / 1906-2 | -       | 210.5         | 2.105          | N. pachyderma | 10       | 0.279 | 0.108 | 3                     |
| 22735 B | PS17 / 1906-2 | -       | 210.5         | 2.105          | N. pachyderma | 10       | 0.320 | 0.142 | not rejected          |
| 22735 C | PS17 / 1906-2 | -       | 210.5         | 2.105          | N. pachyderma | 10       | 0.310 | 0.141 | not rejected          |
| 22735 D | PS17 / 1906-2 | -       | 210.5         | 2.105          | N. pachyderma | 10       | 0.310 | 0.140 | not rejected          |
| 22735 E | PS17 / 1906-2 | -       | 210.5         | 2.105          | N. pachyderma | 10       | 0.302 | 0.129 | not rejected          |
| 22735 F | PS17 / 1906-2 | -       | 210.5         | 2.105          | N. pachyderma | 10       | 0.307 | 0.139 | not rejected          |
| 22735 G | PS17 / 1906-2 | -       | 210.5         | 2.105          | N. pachyderma | 10       | 0.260 | 0.087 | 2                     |
| 22735 H | PS17 / 1906-2 | -       | 210.5         | 2.105          | N. pachyderma | 10       | 0.300 | 0.130 | not rejected          |
| 22735 I | PS17 / 1906-2 | -       | 210.5         | 2.105          | N. pachyderma | 10       | 0.273 | 0.093 | 2                     |
| 22735 J | PS17 / 1906-2 | -       | 210.5         | 2.105          | N. pachyderma | 10       | 0.332 | 0.152 | not rejected          |
| 22735 K | PS17 / 1906-2 | -       | 210.5         | 2.105          | N. pachyderma | 10       | 0.316 | 0.153 | not rejected          |
| 22735 L | PS17 / 1906-2 | -       | 210.5         | 2.105          | N. pachyderma | 10       | 0.292 | 0.081 | 2                     |
| 22736 A | PS17 / 1906-2 | -       | 220.5         | 2.205          | N. pachyderma | 10       | 0.340 | 0.164 | not rejected          |
| 22736 B | PS17 / 1906-2 | -       | 220.5         | 2.205          | N. pachyderma | 10       | 0.337 | 0.155 | not rejected          |
| 22736 C | PS17 / 1906-2 | -       | 220.5         | 2.205          | N. pachyderma | 10       | 0.343 | 0.156 | not rejected          |
| 22736 D | PS17 / 1906-2 | -       | 220.5         | 2.205          | N. pachyderma | 10       | 0.269 | 0.105 | 3                     |
| 22736 E | PS17 / 1906-2 | -       | 220.5         | 2.205          | N. pachyderma | 10       | 0.361 | 0.172 | not rejected          |
| 22736 F | PS17 / 1906-2 | -       | 220.5         | 2.205          | N. pachyderma | 10       | 0.344 | 0.170 | not rejected          |
| 22736 G | PS17 / 1906-2 | -       | 220.5         | 2.205          | N. pachyderma | 10       | 0.358 | 0.185 | not rejected          |
| 22736 H | PS17 / 1906-2 | -       | 220.5         | 2.205          | N. pachyderma | 10       | 0.270 | 0.103 | 3                     |
| 22736 I | PS17 / 1906-2 | -       | 220.5         | 2.205          | N. pachyderma | 10       | 0.328 | 0.157 | not rejected          |
| 22736 J | PS17 / 1906-2 | -       | 220.5         | 2.205          | N. pachyderma | 10       | 0.355 | 0.179 | not rejected          |
| 22736 K | PS17 / 1906-2 | -       | 220.5         | 2.205          | N. pachyderma | 10       | 0.311 | 0.137 | 3                     |
| 22736 L | PS17 / 1906-2 | -       | 220.5         | 2.205          | N. pachyderma | 10       | 0.353 | 0.187 | not rejected          |
| 22737 A | PS17 / 1906-2 | -       | 329           | 3.29           | N. pachyderma | 12       | 0.349 | 0.176 | not rejected          |
| 22737 B | PS17 / 1906-2 | -       | 329           | 3.29           | N. pachyderma | 12       | 0.328 | 0.163 | not rejected          |
| 22737 C | PS17 / 1906-2 | -       | 329           | 3.29           | N. pachyderma | 12       | 0.349 | 0.177 | not rejected          |
| 22737 D | PS17 / 1906-2 | -       | 329           | 3.29           | N. pachyderma | 12       | 0.343 | 0.170 | not rejected          |
| 22737 E | PS17 / 1906-2 | -       | 329           | 3.29           | N. pachyderma | 12       | 0.339 | 0.164 | not rejected          |
| 22737 F | PS17 / 1906-2 | -       | 329           | 3.29           | N. pachyderma | 12       | 0.305 | 0.149 | 3                     |
| 22737 G | PS17 / 1906-2 | -       | 329           | 3.29           | N. pachyderma | 12       | 0.359 | 0.182 | not rejected          |
| 22737 H | PS17 / 1906-2 | -       | 329           | 3.29           | N. pachyderma | 12       | 0.333 | 0.160 | not rejected          |
| 22738 A | PS17 / 1906-2 | -       | 360.5         | 3.605          | N. pachyderma | 12       | 0.357 | 0.180 | not rejected          |
| 22738 B | PS17 / 1906-2 | -       | 360.5         | 3.605          | N. pachyderma | 12       | 0.348 | 0.170 | not rejected          |
| 22738 C | PS17 / 1906-2 | -       | 360.5         | 3.605          | N. pachyderma | 12       | 0.365 | 0.191 | not rejected          |
| 22738 D | PS17 / 1906-2 | -       | 360.5         | 3.605          | N. pachyderma | 12       | 0.232 | 0.066 | 1                     |
| 22738 E | PS17 / 1906-2 | -       | 360.5         | 3.605          | N. pachyderma | 12       | 0.352 | 0.166 | not rejected          |
| 22738 F | PS17 / 1906-2 | -       | 360.5         | 3.605          | N. pachyderma | 12       | 0.312 | 0.151 | 3                     |
| 22738 G | PS17 / 1906-2 | -       | 360.5         | 3.605          | N. pachyderma | 12       | 0.350 | 0.175 | not rejected          |
| 22738 H | PS17 / 1906-2 | -       | 360.5         | 3.605          | N. pachyderma | 12       | 0.344 | 0.167 | not rejected          |
| 22738 I | PS17 / 1906-2 | -       | 360.5         | 3.605          | N. pachyderma | 12       | 0.367 | 0.191 | not rejected          |
| 22738 J | PS17 / 1906-2 | -       | 360.5         | 3.605          | N. pachyderma | 12       | 0.339 | 0.166 | not rejected          |

| UAL     | Core          | Section | Interval (cm) | Core depth (m) | Genus/sp.        | *n tests | DLAsp | DLGlu | **Rejection criterion |
|---------|---------------|---------|---------------|----------------|------------------|----------|-------|-------|-----------------------|
| 22738 K | PS17 / 1906-2 | -       | 360.5         | 3.605          | N. pachyderma    | 12       | 0.361 | 0.187 | not rejected          |
| 22738 L | PS17 / 1906-2 | -       | 360.5         | 3.605          | N. pachyderma    | 12       | 0.363 | 0.185 | not rejected          |
| 22739 A | PS17 / 1906-2 | -       | 550.5         | 5.505          | N. pachyderma    | frags    | 0.403 | 0.189 | not rejected          |
| 22739 B | PS17 / 1906-2 | -       | 550.5         | 5.505          | N. pachyderma    | frags    | 0.468 | 0.263 | not rejected          |
| 22739 C | PS17 / 1906-2 | -       | 550.5         | 5.505          | N. pachyderma    | frags    | 0.460 | 0.251 | not rejected          |
| 22739 D | PS17 / 1906-2 | -       | 550.5         | 5.505          | N. pachyderma    | frags    | 0.426 | 0.205 | not rejected          |
| 22739 E | PS17 / 1906-2 | -       | 550.5         | 5.505          | N. pachyderma    | frags    | 0.343 | 0.147 | 1                     |
| 22740 A | ODP 151/ 907A | 1H-1    | 105 - 107     | 1.05           | C. wuellerstorfi | 1        | 0.164 | 0.050 | not rejected          |
| 22740 B | ODP 151/ 907A | 1H-1    | 105 - 107     | 1.05           | C. wuellerstorfi | 1        | 0.175 | 0.056 | not rejected          |
| 22740 C | ODP 151/ 907A | 1H-1    | 105 - 107     | 1.05           | C. wuellerstorfi | 2        | 0.123 | 0.053 | 2                     |
| 22740 D | ODP 151/ 907A | 1H-1    | 105 - 107     | 1.05           | C. wuellerstorfi | 2        | 0.153 | 0.061 | not rejected          |
| 22740 E | ODP 151/ 907A | 1H-1    | 105 - 107     | 1.05           | C. wuellerstorfi | 2        | 0.169 | 0.061 | not rejected          |
| 22740 F | ODP 151/ 907A | 1H-1    | 105 - 107     | 1.05           | C. wuellerstorfi | 2        | 0.208 | 0.082 | not rejected          |
| 22740 G | ODP 151/ 907A | 1H-1    | 105 - 107     | 1.05           | C. wuellerstorfi | 3        | 0.127 | 0.045 | not rejected          |
| 22740 H | ODP 151/ 907A | 1H-1    | 105 - 107     | 1.05           | C. wuellerstorfi | 3        | 0.120 | 0.056 | 2                     |
| 22740 I | ODP 151/ 907A | 1H-1    | 105 - 107     | 1.05           | C. wuellerstorfi | frags    | 0.124 | 0.076 | 2                     |
| 22741 A | ODP 151/ 907A | 1H-2    | 37 - 39       | 1.87           | C. wuellerstorfi | 2        | 0.358 | 0.153 | not rejected          |
| 22741 B | ODP 151/ 907A | 1H-2    | 37 - 39       | 1.87           | C. wuellerstorfi | 2        | 0.353 | 0.158 | not rejected          |
| 22741 C | ODP 151/ 907A | 1H-2    | 37 - 39       | 1.87           | C. wuellerstorfi | 2        | 0.337 | 0.146 | not rejected          |
| 22741 D | ODP 151/ 907A | 1H-2    | 37 - 39       | 1.87           | C. wuellerstorfi | 2        | 0.333 | 0.169 | not rejected          |
| 22741 E | ODP 151/ 907A | 1H-2    | 37 - 39       | 1.87           | C. wuellerstorfi | 2        | 0.353 | 0.164 | not rejected          |
| 22741 F | ODP 151/ 907A | 1H-2    | 37 - 39       | 1.87           | C. wuellerstorfi | 2        | 0.350 | 0.142 | not rejected          |
| 22741 G | ODP 151/ 907A | 1H-2    | 37 - 39       | 1.87           | C. wuellerstorfi | 2        | 0.335 | 0.140 | not rejected          |
| 22741 H | ODP 151/ 907A | 1H-2    | 37 - 39       | 1.87           | C. wuellerstorfi | 2        | 0.348 | 0.182 | 3                     |
| 22741 I | ODP 151/ 907A | 1H-2    | 37 - 39       | 1.87           | C. wuellerstorfi | 2        | 0.345 | 0.149 | not rejected          |
| 22741 J | ODP 151/ 907A | 1H-2    | 37 - 39       | 1.87           | C. wuellerstorfi | 2        | 0.360 | 0.165 | not rejected          |
| 22741 K | ODP 151/ 907A | 1H-2    | 37 - 39       | 1.87           | C. wuellerstorfi | 2        | 0.330 | 0.139 | not rejected          |
| 22741 L | ODP 151/ 907A | 1H-2    | 37 - 39       | 1.87           | C. wuellerstorfi | 2        | 0.313 | 0.167 | not rejected          |
| 22741 M | ODP 151/ 907A | 1H-2    | 37 - 39       | 1.87           | C. wuellerstorfi | 2        | 0.350 | 0.154 | not rejected          |
| 22741 N | ODP 151/ 907A | 1H-2    | 37 - 39       | 1.87           | C. wuellerstorfi | 2        | 0.348 | 0.156 | not rejected          |
| 22741 O | ODP 151/ 907A | 1H-2    | 37 - 39       | 1.87           | C. wuellerstorfi | 2        | 0.321 | 0.132 | not rejected          |
| 22741 P | ODP 151/ 907A | 1H-2    | 37 - 39       | 1.87           | C. wuellerstorfi | 2        | 0.323 | 0.151 | not rejected          |
| 22741 Q | ODP 151/ 907A | 1H-2    | 37 - 39       | 1.87           | C. wuellerstorfi | 2        | 0.341 | 0.151 | not rejected          |
| 22741 R | ODP 151/ 907A | 1H-2    | 37 - 39       | 1.87           | C. wuellerstorfi | 3        | 0.333 | 0.151 | not rejected          |
| 22741 S | ODP 151/ 907A | 1H-2    | 37 - 39       | 1.87           | C. wuellerstorfi | 3        | 0.314 | 0.138 | not rejected          |
| 22741 T | ODP 151/ 907A | 1H-2    | 37 - 39       | 1.87           | C. wuellerstorfi | 3        | 0.309 | 0.147 | not rejected          |
| 22741 U | ODP 151/ 907A | 1H-2    | 37 - 39       | 1.87           | C. wuellerstorfi | 3        | 0.333 | 0.143 | not rejected          |
| 22742 A | ODP 151/ 907A | 1H-2    | 85 - 87       | 2.35           | C. wuellerstorfi | 1        | 0.160 | 0.067 | not rejected          |
| 22742 B | ODP 151/ 907A | 1H-2    | 85 - 87       | 2.35           | C. wuellerstorfi | 2        | 0.133 | 0.062 | 2                     |
| 22742 C | ODP 151/ 907A | 1H-2    | 85 - 87       | 2.35           | C. wuellerstorfi | 2        | 0.162 | 0.067 | not rejected          |
| 22742 D | ODP 151/ 907A | 1H-2    | 85 - 87       | 2.35           | C. wuellerstorfi | 2        | 0.154 | 0.054 | not rejected          |
| 22742 E | ODP 151/ 907A | 1H-2    | 85 - 87       | 2.35           | C. wuellerstorfi | 2        | 0.179 | 0.061 | not rejected          |
| 22742 F | ODP 151/ 907A | 1H-2    | 85 - 87       | 2.35           | C. wuellerstorfi | 2        | 0.156 | 0.067 | not rejected          |
| 22742 G | ODP 151/ 907A | 1H-2    | 85 - 87       | 2.35           | C. wuellerstorfi | 2        | 0.183 | 0.076 | not rejected          |
| 22742 H | ODP 151/ 907A | 1H-2    | 85 - 87       | 2.35           | C. wuellerstorfi | 2        | 0.139 | 0.069 | 2                     |
| 22742 I | ODP 151/ 907A | 1H-2    | 85 - 87       | 2.35           | C. wuellerstorfi | 2        | 0.154 | 0.073 | 2                     |
| 22742 J | ODP 151/ 907A | 1H-2    | 85 - 87       | 2.35           | C. wuellerstorfi | 3        | 0.148 | 0.067 | 2                     |
| 22742 K | ODP 151/ 907A | 1H-2    | 85 - 87       | 2.35           | C. wuellerstorfi | 3        | 0.144 | 0.060 | not rejected          |
| 22742 L | ODP 151/ 907A | 1H-2    | 85 - 87       | 2.35           | C. wuellerstorfi | 4        | 0.147 | 0.062 | not rejected          |
| 22742 M | ODP 151/ 907A | 1H-2    | 85 - 87       | 2.35           | C. wuellerstorfi | 4        | 0.153 | 0.059 | not rejected          |
| 22742 N | ODP 151/ 907A | 1H-2    | 85 - 87       | 2.35           | C. wuellerstorfi | 4        | 0.154 | 0.070 | 2                     |
| 22742 O | ODP 151/ 907A | 1H-2    | 85 - 87       | 2.35           | C. wuellerstorfi | 4        | 0.228 | 0.101 | 3                     |
| 22743 A | ODP 151/ 907A | 1H-3    | 6 - 8         | 3.06           | C. wuellerstorfi | 2        | 0.411 | 0.230 | not rejected          |
| 22743 B | ODP 151/ 907A | 1H-3    | 6 - 8         | 3.06           | C. wuellerstorfi | 2        | 0.339 | 0.153 | not rejected          |
| 22743 C | ODP 151/ 907A | 1H-3    | 6 - 8         | 3.06           | C. wuellerstorfi | 2        | 0.372 | 0.176 | not rejected          |
| 22743 D | ODP 151/ 907A | 1H-3    | 6 - 8         | 3.06           | C. wuellerstorfi | 2        | 0.365 | 0.175 | not rejected          |
| 22743 E | ODP 151/ 907A | 1H-3    | 6 - 8         | 3.06           | C. wuellerstorfi | 2        | 0.303 | 0.147 | 3                     |
| 22743 F | ODP 151/ 907A | 1H-3    | 6 - 8         | 3.06           | C. wuellerstorfi | 2        | 0.407 | 0.218 | not rejected          |
| 22743 G | ODP 151/ 907A | 1H-3    | 6 - 8         | 3.06           | C. wuellerstorfi | 2        | 0.406 | 0.199 | not rejected          |
| 22743 H | ODP 151/ 907A | 1H-3    | 6 - 8         | 3.06           | C. wuellerstorfi | 3        | 0.379 | 0.202 | not rejected          |
| 22743 I | ODP 151/ 907A | 1H-3    | 6 - 8         | 3.06           | C. wuellerstorfi | 3        | 0.409 | 0.229 | not rejected          |
| 22743 J | ODP 151/ 907A | 1H-3    | 6 - 8         | 3.06           | C. wuellerstorfi | 3        | 0.405 | 0.202 | not rejected          |
| 22744 A | ODP 151/ 907A | 2H-6    | 41 - 43       | 15.21          | C. wuellerstorfi | 1        | 0.489 | 0.245 | 3                     |
| 22744 B | ODP 151/ 907A | 2H-6    | 41 - 43       | 15.21          | C. wuellerstorfi | 2        | 0.530 | 0.286 | not rejected          |
| 22744 C | ODP 151/ 907A | 2H-6    | 41 - 43       | 15.21          | C. wuellerstorfi | 2        | 0.551 | 0.345 | not rejected          |

| UAL     | Core          | Section | Interval (cm) | Core depth (m) | Genus/sp.        | *n tests | DLAsp | DLGlu | **Rejection criterion |
|---------|---------------|---------|---------------|----------------|------------------|----------|-------|-------|-----------------------|
| 22744 D | ODP 151/ 907A | 2H-6    | 41 - 43       | 15.21          | C. wuellerstorfi | 2        | 0.567 | 0.388 | not rejected          |
| 22744 E | ODP 151/ 907A | 2H-6    | 41 - 43       | 15.21          | C. wuellerstorfi | 2        | 0.508 | 0.307 | not rejected          |
| 22744 F | ODP 151/ 907A | 2H-6    | 41 - 43       | 15.21          | C. wuellerstorfi | 2        | 0.563 | 0.358 | not rejected          |
| 22744 G | ODP 151/ 907A | 2H-6    | 41 - 43       | 15.21          | C. wuellerstorfi | 2        | 0.553 | 0.362 | not rejected          |
| 22744 H | ODP 151/ 907A | 2H-6    | 41 - 43       | 15.21          | C. wuellerstorfi | 2        | 0.539 | 0.323 | not rejected          |
| 22744 I | ODP 151/ 907A | 2H-6    | 41 - 43       | 15.21          | C. wuellerstorfi | 2        | 0.555 | 0.348 | not rejected          |
| 22744 J | ODP 151/ 907A | 2H-6    | 41 - 43       | 15.21          | C. wuellerstorfi | 2        | 0.535 | 0.310 | not rejected          |
| 22744 K | ODP 151/ 907A | 2H-6    | 41 - 43       | 15.21          | C. wuellerstorfi | 2        | 0.552 | 0.327 | not rejected          |
| 22744 L | ODP 151/ 907A | 2H-6    | 41 - 43       | 15.21          | C. wuellerstorfi | 2        | 0.534 | 0.288 | not rejected          |
| 22744 M | ODP 151/ 907A | 2H-6    | 41 - 43       | 15.21          | C. wuellerstorfi | 2        | 0.561 | 0.377 | not rejected          |
| 22744 N | ODP 151/ 907A | 2H-6    | 41 - 43       | 15.21          | C. wuellerstorfi | 3        | 0.561 | 0.380 | not rejected          |
| 22744 O | ODP 151/ 907A | 2H-6    | 41 - 43       | 15.21          | C. wuellerstorfi | 3        | 0.557 | 0.372 | not rejected          |
| 22744 P | ODP 151/ 907A | 2H-6    | 41 - 43       | 15.21          | C. wuellerstorfi | 3        | 0.567 | 0.377 | not rejected          |
| 22744 Q | ODP 151/ 907A | 2H-6    | 41 - 43       | 15.21          | C. wuellerstorfi | 3        | 0.558 | 0.360 | not rejected          |
| 22744 R | ODP 151/ 907A | 2H-6    | 41 - 43       | 15.21          | C. wuellerstorfi | 5        | 0.551 | 0.350 | not rejected          |
| 22745 A | ODP 151/ 907A | 1H-1    | 105 - 107     | 1.05           | N. pachyderma    | 12       | 0.199 | 0.094 | 3                     |
| 22745 B | ODP 151/ 907A | 1H-1    | 105 - 107     | 1.05           | N. pachyderma    | 10       | 0.199 | 0.076 | not rejected          |
| 22745 C | ODP 151/ 907A | 1H-1    | 105 - 107     | 1.05           | N. pachyderma    | 10       | 0.192 | 0.085 | not rejected          |
| 22745 D | ODP 151/ 907A | 1H-1    | 105 - 107     | 1.05           | N. pachyderma    | 10       | 0.220 | 0.065 | 2                     |
| 22745 E | ODP 151/ 907A | 1H-1    | 105 - 107     | 1.05           | N. pachyderma    | 10       | 0.187 | 0.071 | not rejected          |
| 22745 F | ODP 151/ 907A | 1H-1    | 105 - 107     | 1.05           | N. pachyderma    | 10       | 0.205 | 0.081 | not rejected          |
| 22745 G | ODP 151/ 907A | 1H-1    | 105 - 107     | 1.05           | N. pachyderma    | 10       | 0.198 | 0.077 | not rejected          |
| 22745 H | ODP 151/ 907A | 1H-1    | 105 - 107     | 1.05           | N. pachyderma    | 10       | 0.189 | 0.070 | not rejected          |
| 22745 I | ODP 151/ 907A | 1H-1    | 105 - 107     | 1.05           | N. pachyderma    | 10       | 0.208 | 0.078 | not rejected          |
| 22745 J | ODP 151/ 907A | 1H-1    | 105 - 107     | 1.05           | N. pachyderma    | 10       | 0.208 | 0.078 | not rejected          |
| 22745 K | ODP 151/ 907A | 1H-1    | 105 - 107     | 1.05           | N. pachyderma    | 10       | 0.208 | 0.085 | not rejected          |
| 22745 L | ODP 151/ 907A | 1H-1    | 105 - 107     | 1.05           | N. pachyderma    | 10       | 0.208 | 0.085 | not rejected          |
| 22745 N | ODP 151/ 907A | 1H-1    | 105 - 107     | 1.05           | N. pachyderma    | 10       | 0.197 | 0.081 | not rejected          |
| 22745 O | ODP 151/ 907A | 1H-1    | 105 - 107     | 1.05           | N. pachyderma    | 10       | 0.206 | 0.085 | not rejected          |
| 22746 A | ODP 151/ 907A | 1H-2    | 37 - 39       | 1.87           | N. pachyderma    | 10       | 0.288 | 0.117 | not rejected          |
| 22746 B | ODP 151/ 907A | 1H-2    | 37 - 39       | 1.87           | N. pachyderma    | 10       | 0.276 | 0.111 | not rejected          |
| 22746 C | ODP 151/ 907A | 1H-2    | 37 - 39       | 1.87           | N. pachyderma    | 10       | 0.278 | 0.116 | not rejected          |
| 22746 D | ODP 151/ 907A | 1H-2    | 37 - 39       | 1.87           | N. pachyderma    | 15       | 0.250 | 0.085 | 2                     |
| 22746 E | ODP 151/ 907A | 1H-2    | 37 - 39       | 1.87           | N. pachyderma    | 15       | 0.278 | 0.116 | not rejected          |
| 22746 F | ODP 151/ 907A | 1H-2    | 37 - 39       | 1.87           | N. pachyderma    | 15       | 0.283 | 0.118 | not rejected          |
| 22746 G | ODP 151/ 907A | 1H-2    | 37 - 39       | 1.87           | N. pachyderma    | 15       | 0.287 | 0.111 | not rejected          |
| 22746 H | ODP 151/ 907A | 1H-2    | 37 - 39       | 1.87           | N. pachyderma    | 15       | 0.284 | 0.114 | not rejected          |
| 22746 I | ODP 151/ 907A | 1H-2    | 37 - 39       | 1.87           | N. pachyderma    | 15       | 0.279 | 0.114 | not rejected          |
| 22746 J | ODP 151/ 907A | 1H-2    | 37 - 39       | 1.87           | N. pachyderma    | 15       | 0.269 | 0.102 | 3                     |
| 22746 K | ODP 151/ 907A | 1H-2    | 37 - 39       | 1.87           | N. pachyderma    | 15       | 0.275 | 0.111 | not rejected          |
| 22746 L | ODP 151/ 907A | 1H-2    | 37 - 39       | 1.87           | N. pachyderma    | 15       | 0.275 | 0.112 | not rejected          |
| 22746 M | ODP 151/ 907A | 1H-2    | 37 - 39       | 1.87           | N. pachyderma    | 12       | 0.289 | 0.118 | not rejected          |
| 22747 A | ODP 151/ 907A | 1H-2    | 85 - 87       | 2.35           | N. pachyderma    | 10       | 0.282 | 0.087 | 1                     |
| 22747 B | ODP 151/ 907A | 1H-2    | 85 - 87       | 2.35           | N. pachyderma    | 10       | 0.337 | 0.143 | not rejected          |
| 22747 C | ODP 151/ 907A | 1H-2    | 85 - 87       | 2.35           | N. pachyderma    | 10       | 0.312 | 0.133 | not rejected          |
| 22747 D | ODP 151/ 907A | 1H-2    | 85 - 87       | 2.35           | N. pachyderma    | 10       | 0.325 | 0.144 | not rejected          |
| 22747 E | ODP 151/ 907A | 1H-2    | 85 - 87       | 2.35           | N. pachyderma    | 10       | 0.336 | 0.155 | not rejected          |
| 22747 F | ODP 151/ 907A | 1H-2    | 85 - 87       | 2.35           | N. pachyderma    | 10       | 0.327 | 0.142 | not rejected          |
| 22747 G | ODP 151/ 907A | 1H-2    | 85 - 87       | 2.35           | N. pachyderma    | 10       | 0.330 | 0.151 | not rejected          |
| 22747 H | ODP 151/ 907A | 1H-2    | 85 - 87       | 2.35           | N. pachyderma    | 10       | 0.329 | 0.145 | not rejected          |
| 22747 I | ODP 151/ 907A | 1H-2    | 85 - 87       | 2.35           | N. pachyderma    | 10       | 0.335 | 0.153 | not rejected          |
| 22747 J | ODP 151/ 907A | 1H-2    | 85 - 87       | 2.35           | N. pachyderma    | 10       | 0.320 | 0.145 | not rejected          |
| 22747 K | ODP 151/ 907A | 1H-2    | 85 - 87       | 2.35           | N. pachyderma    | 10       | 0.307 | 0.133 | not rejected          |
| 22747 L | ODP 151/ 907A | 1H-2    | 85 - 87       | 2.35           | N. pachyderma    | 10       | 0.316 | 0.140 | not rejected          |
| 22747 M | ODP 151/ 907A | 1H-2    | 85 - 87       | 2.35           | N. pachyderma    | 10       | 0.331 | 0.161 | not rejected          |
| 22747 O | ODP 151/ 907A | 1H-2    | 85 - 87       | 2.35           | N. pachyderma    | 10       | 0.316 | 0.145 | not rejected          |
| 22747 P | ODP 151/ 907A | 1H-2    | 85 - 87       | 2.35           | N. pachyderma    | 10       | 0.297 | 0.133 | 3                     |
| 22747 Q | ODP 151/ 907A | 1H-2    | 85 - 87       | 2.35           | N. pachyderma    | 10       | 0.310 | 0.141 | not rejected          |
| 22747 R | ODP 151/ 907A | 1H-2    | 85 - 87       | 2.35           | N. pachyderma    | 10       | 0.340 | 0.162 | not rejected          |
| 22748 A | ODP 151/ 907A | 1H-3    | 6 - 8         | 3.06           | N. pachyderma    | 10       | 0.345 | 0.160 | not rejected          |
| 22748 B | ODP 151/ 907A | 1H-3    | 6 - 8         | 3.06           | N. pachyderma    | 10       | 0.359 | 0.175 | not rejected          |
| 22748 C | ODP 151/ 907A | 1H-3    | 6 - 8         | 3.06           | N. pachyderma    | 10       | 0.361 | 0.173 | not rejected          |
| 22748 D | ODP 151/ 907A | 1H-3    | 6 - 8         | 3.06           | N. pachyderma    | 10       | 0.336 | 0.156 | not rejected          |
| 22748 E | ODP 151/ 907A | 1H-3    | 6 - 8         | 3.06           | N. pachyderma    | 15       | 0.358 | 0.173 | not rejected          |
| 22748 F | ODP 151/ 907A | 1H-3    | 6 - 8         | 3.06           | N. pachyderma    | 15       | 0.353 | 0.159 | not rejected          |

| UAL     | Core           | Section | Interval (cm) | Core depth (m) | Genus/sp.        | *n tests | DLAsp | DLGlu | **Rejection criterion |
|---------|----------------|---------|---------------|----------------|------------------|----------|-------|-------|-----------------------|
| 22748 G | ODP 151/ 907A  | 1H-3    | 6 - 8         | 3.06           | N. pachyderma    | 15       | 0.339 | 0.162 | not rejected          |
| 22748 H | ODP 151/ 907A  | 1H-3    | 6 - 8         | 3.06           | N. pachyderma    | 15       | 0.361 | 0.179 | not rejected          |
| 22748 I | ODP 151/ 907A  | 1H-3    | 6 - 8         | 3.06           | N. pachyderma    | 15       | 0.356 | 0.174 | not rejected          |
| 22748 J | ODP 151/ 907A  | 1H-3    | 6 - 8         | 3.06           | N. pachyderma    | 15       | 0.367 | 0.186 | not rejected          |
| 22748 K | ODP 151/ 907A  | 1H-3    | 6 - 8         | 3.06           | N. pachyderma    | 15       | 0.356 | 0.171 | not rejected          |
| 22748 L | ODP 151/ 907A  | 1H-3    | 6 - 8         | 3.06           | N. pachyderma    | 15       | 0.341 | 0.164 | not rejected          |
| 22748 M | ODP 151/ 907A  | 1H-3    | 6 - 8         | 3.06           | N. pachyderma    | 15       | 0.367 | 0.179 | not rejected          |
| 22748 N | ODP 151/ 907A  | 1H-3    | 6 - 8         | 3.06           | N. pachyderma    | 15       | 0.351 | 0.171 | not rejected          |
| 22748 O | ODP 151/ 907A  | 1H-3    | 6 - 8         | 3.06           | N. pachyderma    | 15       | 0.372 | 0.183 | not rejected          |
| 22749 A | ODP 151/ 907A  | 1H-4    | 56 - 58       | 5.06           | N. pachyderma    | 10       | 0.411 | 0.207 | not rejected          |
| 22749 B | ODP 151/ 907A  | 1H-4    | 56 - 58       | 5.06           | N. pachyderma    | 10       | 0.382 | 0.177 | not rejected          |
| 22749 C | ODP 151/ 907A  | 1H-4    | 56 - 58       | 5.06           | N. pachyderma    | 10       | 0.374 | 0.168 | not rejected          |
| 22749 D | ODP 151/ 907A  | 1H-4    | 56 - 58       | 5.06           | N. pachyderma    | 10       | 0.388 | 0.175 | not rejected          |
| 22749 E | ODP 151/ 907A  | 1H-4    | 56 - 58       | 5.06           | N. pachyderma    | 10       | 0.480 | 0.167 | 2                     |
| 22749 F | ODP 151/ 907A  | 1H-4    | 56 - 58       | 5.06           | N. pachyderma    | 10       | 0.371 | 0.174 | not rejected          |
| 22749 G | ODP 151/ 907A  | 1H-4    | 56 - 58       | 5.06           | N. pachyderma    | 10       | 0.372 | 0.182 | not rejected          |
| 22749 H | ODP 151/ 907A  | 1H-4    | 56 - 58       | 5.06           | N. pachyderma    | 15       | 0.408 | 0.206 | not rejected          |
| 22749 I | ODP 151/ 907A  | 1H-4    | 56 - 58       | 5.06           | N. pachyderma    | 15       | 0.401 | 0.196 | not rejected          |
| 22749 J | ODP 151/ 907A  | 1H-4    | 56 - 58       | 5.06           | N. pachyderma    | 15       | 0.397 | 0.195 | not rejected          |
| 22749 K | ODP 151/ 907A  | 1H-4    | 56 - 58       | 5.06           | N. pachyderma    | 15       | 0.435 | 0.180 | 3                     |
| 22749 L | ODP 151/ 907A  | 1H-4    | 56 - 58       | 5.06           | N. pachyderma    | 15       | 0.383 | 0.186 | not rejected          |
| 22749 M | ODP 151/ 907A  | 1H-4    | 56 - 58       | 5.06           | N. pachyderma    | 15       | 0.408 | 0.211 | not rejected          |
| 22749 N | ODP 151/ 907A  | 1H-4    | 56 - 58       | 5.06           | N. pachyderma    | 15       | 0.394 | 0.203 | not rejected          |
| 22749 O | ODP 151/ 907A  | 1H-4    | 56 - 58       | 5.06           | N. pachyderma    | 15       | 0.400 | 0.196 | not rejected          |
| 22749 P | ODP 151/ 907A  | 1H-4    | 56 - 58       | 5.06           | N. pachyderma    | 15       | 0.418 | 0.191 | not rejected          |
| 22749 Q | ODP 151/ 907A  | 1H-4    | 56 - 58       | 5.06           | N. pachyderma    | 15       | 0.418 | 0.213 | not rejected          |
| 22750 A | ODP 151/ 907A  | 1H-5    | 81 - 83       | 6.81           | N. pachyderma    | 10       | 0.388 | 0.168 | not rejected          |
| 22750 B | ODP 151/ 907A  | 1H-5    | 81 - 83       | 6.81           | N. pachyderma    | 10       | 0.386 | 0.163 | not rejected          |
| 22750 C | ODP 151/ 907A  | 1H-5    | 81 - 83       | 6.81           | N. pachyderma    | 10       | 0.413 | 0.215 | not rejected          |
| 22750 D | ODP 151/ 907A  | 1H-5    | 81 - 83       | 6.81           | N. pachyderma    | 10       | 0.398 | 0.187 | not rejected          |
| 22750 E | ODP 151/ 907A  | 1H-5    | 81 - 83       | 6.81           | N. pachyderma    | 10       | 0.395 | 0.196 | not rejected          |
| 22750 F | ODP 151/ 907A  | 1H-5    | 81 - 83       | 6.81           | N. pachyderma    | 10       | 0.368 | 0.165 | not rejected          |
| 22750 G | ODP 151/ 907A  | 1H-5    | 81 - 83       | 6.81           | N. pachyderma    | 10       | 0.367 | 0.173 | not rejected          |
| 22750 H | ODP 151/ 907A  | 1H-5    | 81 - 83       | 6.81           | N. pachyderma    | 10       | 0.456 | 0.270 | 3                     |
| 22750 I | ODP 151/ 907A  | 1H-5    | 81 - 83       | 6.81           | N. pachyderma    | 10       | 0.396 | 0.199 | not rejected          |
| 22750 J | ODP 151/ 907A  | 1H-5    | 81 - 83       | 6.81           | N. pachyderma    | 10       | 0.393 | 0.185 | not rejected          |
| 22750 K | ODP 151/ 907A  | 1H-5    | 81 - 83       | 6.81           | N. pachyderma    | 10       | 0.386 | 0.185 | not rejected          |
| 22750 L | ODP 151/ 907A  | 1H-5    | 81 - 83       | 6.81           | N. pachyderma    | 10       | 0.383 | 0.181 | not rejected          |
| 22751 A | ODP 151/ 907A  | 2H-6    | 41 - 43       | 15.21          | N. pachyderma    | 10       | 0.476 | 0.236 | not rejected          |
| 22751 B | ODP 151/ 907A  | 2H-6    | 41 - 43       | 15.21          | N. pachyderma    | 10       | 0.355 | 0.127 | 1                     |
| 22751 C | ODP 151/ 907A  | 2H-6    | 41 - 43       | 15.21          | N. pachyderma    | 10       | 0.515 | 0.298 | not rejected          |
| 22751 D | ODP 151/ 907A  | 2H-6    | 41 - 43       | 15.21          | N. pachyderma    | 10       | 0.461 | 0.233 | not rejected          |
| 22751 E | ODP 151/ 907A  | 2H-6    | 41 - 43       | 15.21          | N. pachyderma    | 10       | 0.486 | 0.244 | not rejected          |
| 22751 F | ODP 151/ 907A  | 2H-6    | 41 - 43       | 15.21          | N. pachyderma    | 10       | 0.534 | 0.322 | not rejected          |
| 22751 G | ODP 151/ 907A  | 2H-6    | 41 - 43       | 15.21          | N. pachyderma    | 10       | 0.481 | 0.231 | not rejected          |
| 22751 H | ODP 151/ 907A  | 2H-6    | 41 - 43       | 15.21          | N. pachyderma    | 10       | 0.380 | 0.154 | 1                     |
| 22751 I | ODP 151/ 907A  | 2H-6    | 41 - 43       | 15.21          | N. pachyderma    | frags    | 0.373 | 0.153 | 1                     |
| 22751 J | ODP 151/ 907A  | 2H-6    | 41 - 43       | 15.21          | N. pachyderma    | frags    | 0.422 | 0.184 | not rejected          |
| 22752 A | LOMROG12-TWC03 | TWC     | 5 - 7         | 0.025          | C. wuellerstorfi | 2        | 0.141 | 0.043 | not rejected          |
| 22752 B | LOMROG12-TWC03 | TWC     | 5 - 7         | 0.025          | C. wuellerstorfi | 2        | 0.143 | 0.049 | not rejected          |
| 22752 C | LOMROG12-TWC03 | TWC     | 5 - 7         | 0.025          | C. wuellerstorfi | 2        | 0.132 | 0.043 | not rejected          |
| 22752 D | LOMROG12-TWC03 | TWC     | 5 - 7         | 0.025          | C. wuellerstorfi | 3        | 0.157 | 0.046 | not rejected          |
| 22752 E | LOMROG12-TWC03 | TWC     | 5 - 7         | 0.025          | C. wuellerstorfi | 3        | 0.168 | 0.061 | not rejected          |
| 22752 F | LOMROG12-TWC03 | TWC     | 5 - 7         | 0.025          | C. wuellerstorfi | 3        | 0.157 | 0.054 | not rejected          |
| 22752 G | LOMROG12-TWC03 | TWC     | 5 - 7         | 0.025          | C. wuellerstorfi | 3        | 0.198 | 0.084 | 3                     |
| 22752 H | LOMROG12-TWC03 | TWC     | 5 - 7         | 0.025          | C. wuellerstorfi | 3        | 0.141 | 0.045 | not rejected          |
| 22752 I | LOMROG12-TWC03 | TWC     | 5 - 7         | 0.025          | C. wuellerstorfi | 3        | 0.142 | 0.048 | not rejected          |
| 22752 J | LOMROG12-TWC03 | TWC     | 5 - 7         | 0.025          | C. wuellerstorfi | 3        | 0.141 | 0.043 | not rejected          |
| 22752 K | LOMROG12-TWC03 | TWC     | 5 - 7         | 0.025          | C. wuellerstorfi | 3        | 0.135 | 0.043 | not rejected          |
| 22752 L | LOMROG12-TWC03 | TWC     | 5 - 7         | 0.025          | C. wuellerstorfi | 3        | 0.125 | 0.039 | not rejected          |
| 22752 M | LOMROG12-TWC03 | TWC     | 5 - 7         | 0.025          | C. wuellerstorfi | 3        | 0.142 | 0.047 | not rejected          |
| 22753 A | LOMROG12-TWC03 | TWC     | 12 - 14       | 0.095          | C. wuellerstorfi | 1        | 0.136 | 0.054 | not rejected          |
| 22753 B | LOMROG12-TWC03 | TWC     | 12 - 14       | 0.095          | C. wuellerstorfi | 1        | 0.158 | 0.055 | not rejected          |
| 22753 C | LOMROG12-TWC03 | TWC     | 12 - 14       | 0.095          | C. wuellerstorfi | 1        | 0.159 | 0.050 | not rejected          |
| 22753 D | LOMROG12-TWC03 | TWC     | 12 - 14       | 0.095          | C. wuellerstorfi | 1        | 0.149 | 0.045 | not rejected          |

| UAL     | Core           | Section | Interval (cm) | Core depth (m) | Genus/sp.        | *n tests | DLAsp | DLGlu | **Rejection criterion |
|---------|----------------|---------|---------------|----------------|------------------|----------|-------|-------|-----------------------|
| 22753 E | LOMROG12-TWC03 | TWC     | 12 - 14       | 0.095          | C. wuellerstorfi | 2        | 0.150 | 0.050 | not rejected          |
| 22753 F | LOMROG12-TWC03 | TWC     | 12 - 14       | 0.095          | C. wuellerstorfi | 2        | 0.162 | 0.058 | not rejected          |
| 22753 G | LOMROG12-TWC03 | TWC     | 12 - 14       | 0.095          | C. wuellerstorfi | 2        | 0.135 | 0.042 | not rejected          |
| 22753 H | LOMROG12-TWC03 | TWC     | 12 - 14       | 0.095          | C. wuellerstorfi | 2        | 0.167 | 0.054 | not rejected          |
| 22753 I | LOMROG12-TWC03 | TWC     | 12 - 14       | 0.095          | C. wuellerstorfi | 2        | 0.226 | 0.103 | 3                     |
| 22753 J | LOMROG12-TWC03 | TWC     | 12 - 14       | 0.095          | C. wuellerstorfi | 2        | 0.142 | 0.058 | not rejected          |
| 22753 K | LOMROG12-TWC03 | TWC     | 12 - 14       | 0.095          | C. wuellerstorfi | 2        | 0.150 | 0.049 | not rejected          |
| 22753 L | LOMROG12-TWC03 | TWC     | 12 - 14       | 0.095          | C. wuellerstorfi | 2        | 0.220 | 0.088 | 3                     |
| 22753 M | LOMROG12-TWC03 | TWC     | 12 - 14       | 0.095          | C. wuellerstorfi | 2        | 0.165 | 0.052 | not rejected          |
| 22753 N | LOMROG12-TWC03 | TWC     | 12 - 14       | 0.095          | C. wuellerstorfi | 3        | 0.150 | 0.052 | not rejected          |
| 22753 O | LOMROG12-TWC03 | TWC     | 12 - 14       | 0.095          | C. wuellerstorfi | 3        | 0.144 | 0.049 | 1                     |
| 22753 P | LOMROG12-TWC03 | TWC     | 12 - 14       | 0.095          | C. wuellerstorfi | 3        | 0.175 | 0.053 | not rejected          |
| 22753 Q | LOMROG12-TWC03 | TWC     | 12 - 14       | 0.095          | C. wuellerstorfi | 3        | 0.167 | 0.053 | not rejected          |
| 22753 R | LOMROG12-TWC03 | TWC     | 12 - 14       | 0.095          | C. wuellerstorfi | 5        | 0.183 | 0.066 | not rejected          |
| 22754 A | LOMROG12-PC03  | 1       | 59 - 61       | 0.52           | C. wuellerstorfi | 2        | 0.425 | 0.225 | not rejected          |
| 22754 B | LOMROG12-PC03  | 1       | 59 - 61       | 0.52           | C. wuellerstorfi | 2        | 0.418 | 0.215 | not rejected          |
| 22754 C | LOMROG12-PC03  | 1       | 59 - 61       | 0.52           | C. wuellerstorfi | 2        | 0.407 | 0.210 | not rejected          |
| 22754 D | LOMROG12-PC03  | 1       | 59 - 61       | 0.52           | C. wuellerstorfi | 2        | 0.323 | 0.103 | 2                     |
| 22754 E | LOMROG12-PC03  | 1       | 59 - 61       | 0.52           | C. wuellerstorfi | 3        | 0.428 | 0.218 | not rejected          |
| 22754 F | LOMROG12-PC03  | 1       | 59 - 61       | 0.52           | C. wuellerstorfi | 3        | 0.417 | 0.206 | not rejected          |
| 22754 G | LOMROG12-PC03  | 1       | 59 - 61       | 0.52           | C. wuellerstorfi | 3        | 0.393 | 0.193 | not rejected          |
| 22754 H | LOMROG12-PC03  | 1       | 59 - 61       | 0.52           | C. wuellerstorfi | 3        | 0.428 | 0.221 | not rejected          |
| 22754 I | LOMROG12-PC03  | 1       | 59 - 61       | 0.52           | C. wuellerstorfi | 3        | 0.384 | 0.172 | 3                     |
| 22754 J | LOMROG12-PC03  | 1       | 59 - 61       | 0.52           | C. wuellerstorfi | 3        | 0.369 | 0.145 | 2                     |
| 22754 K | LOMROG12-PC03  | 1       | 59 - 61       | 0.52           | C. wuellerstorfi | 4        | 0.402 | 0.195 | not rejected          |
| 22754 L | LOMROG12-PC03  | 1       | 59 - 61       | 0.52           | C. wuellerstorfi | 4        | 0.389 | 0.187 | not rejected          |
| 22754 M | LOMROG12-PC03  | 1       | 59 - 61       | 0.52           | C. wuellerstorfi | 6        | 0.414 | 0.208 | not rejected          |
| 22755 A | LOMROG12-PC03  | 2       | 69 - 71       | 1.441          | C. wuellerstorfi | 2        | 0.516 | 0.324 | not rejected          |
| 22755 B | LOMROG12-PC03  | 2       | 69 - 71       | 1.441          | C. wuellerstorfi | 3        | 0.502 | 0.280 | not rejected          |
| 22755 C | LOMROG12-PC03  | 2       | 69 - 71       | 1.441          | C. wuellerstorfi | 3        | 0.479 | 0.252 | not rejected          |
| 22755 D | LOMROG12-PC03  | 2       | 69 - 71       | 1.441          | C. wuellerstorfi | 3        | 0.498 | 0.285 | not rejected          |
| 22755 E | LOMROG12-PC03  | 2       | 69 - 71       | 1.441          | C. wuellerstorfi | 3        | 0.506 | 0.294 | not rejected          |
| 22755 F | LOMROG12-PC03  | 2       | 69 - 71       | 1.441          | C. wuellerstorfi | 4        | 0.487 | 0.258 | not rejected          |
| 22755 G | LOMROG12-PC03  | 2       | 69 - 71       | 1.441          | C. wuellerstorfi | 4        | 0.443 | 0.185 | 2                     |
| 22755 H | LOMROG12-PC03  | 2       | 69 - 71       | 1.441          | C. wuellerstorfi | 4        | 0.473 | 0.215 | not rejected          |
| 22755 I | LOMROG12-PC03  | 2       | 69 - 71       | 1.441          | C. wuellerstorfi | 3        | 0.470 | 0.231 | not rejected          |
| 22756 A | LOMROG12-PC09  | 2       | 26 - 28       | 0.8            | C. wuellerstorfi | 2        | 0.420 | 0.214 | not rejected          |
| 22756 B | LOMROG12-PC09  | 2       | 26 - 28       | 0.8            | C. wuellerstorfi | 2        | 0.430 | 0.239 | not rejected          |
| 22756 C | LOMROG12-PC09  | 2       | 26 - 28       | 0.8            | C. wuellerstorfi | 2        | 0.425 | 0.229 | not rejected          |
| 22756 D | LOMROG12-PC09  | 2       | 26 - 28       | 0.8            | C. wuellerstorfi | 2        | 0.444 | 0.245 | not rejected          |
| 22756 E | LOMROG12-PC09  | 2       | 26 - 28       | 0.8            | C. wuellerstorfi | 2        | 0.439 | 0.231 | not rejected          |
| 22756 F | LOMROG12-PC09  | 2       | 26 - 28       | 0.8            | C. wuellerstorfi | 3        | 0.432 | 0.235 | not rejected          |
| 22756 G | LOMROG12-PC09  | 2       | 26 - 28       | 0.8            | C. wuellerstorfi | 3        | 0.452 | 0.253 | not rejected          |
| 22756 H | LOMROG12-PC09  | 2       | 26 - 28       | 0.8            | C. wuellerstorfi | 3        | 0.428 | 0.232 | not rejected          |
| 22756 I | LOMROG12-PC09  | 2       | 26 - 28       | 0.8            | C. wuellerstorfi | 3        | 0.440 | 0.242 | not rejected          |
| 22756 J | LOMROG12-PC09  | 2       | 26 - 28       | 0.8            | C. wuellerstorfi | 3        | 0.440 | 0.236 | not rejected          |
| 22756 K | LOMROG12-PC09  | 2       | 26 - 28       | 0.8            | C. wuellerstorfi | 3        | 0.417 | 0.208 | 3                     |
| 22756 L | LOMROG12-PC09  | 2       | 26 - 28       | 0.8            | C. wuellerstorfi | 3        | 0.417 | 0.246 | not rejected          |
| 22757 A | LOMROG12-PC09  | 2       | 71 - 73       | 1.25           | C. wuellerstorfi | 2        | 0.470 | 0.260 | not rejected          |
| 22757 B | LOMROG12-PC09  | 2       | 71 - 73       | 1.25           | C. wuellerstorfi | 2        | 0.476 | 0.266 | not rejected          |
| 22757 C | LOMROG12-PC09  | 2       | 71 - 73       | 1.25           | C. wuellerstorfi | 2        | 0.453 | 0.211 | 3                     |
| 22757 D | LOMROG12-PC09  | 2       | 71 - 73       | 1.25           | C. wuellerstorfi | 2        | 0.476 | 0.267 | not rejected          |
| 22757 E | LOMROG12-PC09  | 2       | 71 - 73       | 1.25           | C. wuellerstorfi | 2        | 0.496 | 0.278 | not rejected          |
| 22757 F | LOMROG12-PC09  | 2       | 71 - 73       | 1.25           | C. wuellerstorfi | 2        | 0.468 | 0.237 | not rejected          |
| 22757 G | LOMROG12-PC09  | 2       | 71 - 73       | 1.25           | C. wuellerstorfi | 2        | 0.484 | 0.257 | not rejected          |
| 22757 H | LOMROG12-PC09  | 2       | 71 - 73       | 1.25           | C. wuellerstorfi | 2        | 0.477 | 0.264 | not rejected          |
| 22757 I | LOMROG12-PC09  | 2       | 71 - 73       | 1.25           | C. wuellerstorfi | 2        | 0.480 | 0.276 | not rejected          |
| 22757 J | LOMROG12-PC09  | 2       | 71 - 73       | 1.25           | C. wuellerstorfi | 3        | 0.477 | 0.269 | not rejected          |
| 22757 K | LOMROG12-PC09  | 2       | 71 - 73       | 1.25           | C. wuellerstorfi | 3        | 0.471 | 0.262 | not rejected          |
| 22757 L | LOMROG12-PC09  | 2       | 71 - 73       | 1.25           | C. wuellerstorfi | 3        | 0.478 | 0.272 | not rejected          |
| 22757 M | LOMROG12-PC09  | 2       | 71 - 73       | 1.25           | C. wuellerstorfi | 3        | 0.472 | 0.255 | not rejected          |
| 22757 N | LOMROG12-PC09  | 2       | 71 - 73       | 1.25           | C. wuellerstorfi | 3        | 0.485 | 0.287 | not rejected          |
| 22757 O | LOMROG12-PC09  | 2       | 71 - 73       | 1.25           | C. wuellerstorfi | 3        | 0.483 | 0.282 | not rejected          |
| 22757 P | LOMROG12-PC09  | 2       | 71 - 73       | 1.25           | C. wuellerstorfi | 3        | 0.500 | 0.285 | 3                     |
| 22757 Q | LOMROG12-PC09  | 2       | 71 - 73       | 1.25           | C. wuellerstorfi | 3        | 0.481 | 0.264 | not rejected          |

| UAL     | Core          | Section | Interval (cm) | Core depth (m) | Genus/sp.        | *n tests | DLAsp | DLGlu | **Rejection criterion |
|---------|---------------|---------|---------------|----------------|------------------|----------|-------|-------|-----------------------|
| 22757 R | LOMROG12-PC09 | 2       | 71 -73        | 1.25           | C. wuellerstorfi | 3        | 0.468 | 0.278 | not rejected          |
| 22757 S | LOMROG12-PC09 | 2       | 71 -73        | 1.25           | C. wuellerstorfi | 3        | 0.465 | 0.267 | not rejected          |
| 22757 T | LOMROG12-PC09 | 2       | 71 -73        | 1.25           | C. wuellerstorfi | 3        | 0.475 | 0.271 | not rejected          |
| 22757 U | LOMROG12-PC09 | 2       | 71 -73        | 1.25           | C. wuellerstorfi | 6        | 0.472 | 0.260 | not rejected          |
| 22757 V | LOMROG12-PC09 | 2       | 71 -73        | 1.25           | C. wuellerstorfi | 6        | 0.472 | 0.259 | not rejected          |
| 22758 A | LOMROG12-PC09 | 2       | 144 -146      | 1.98           | C. wuellerstorfi | 2        | 0.513 | 0.285 | not rejected          |
| 22758 B | LOMROG12-PC09 | 2       | 144 -146      | 1.98           | C. wuellerstorfi | 3        | 0.521 | 0.290 | not rejected          |
| 22758 C | LOMROG12-PC09 | 2       | 144 -146      | 1.98           | C. wuellerstorfi | 3        | 0.516 | 0.299 | not rejected          |
| 22758 D | LOMROG12-PC09 | 2       | 144 -146      | 1.98           | C. wuellerstorfi | 3        | 0.505 | 0.269 | not rejected          |
| 22758 E | LOMROG12-PC09 | 2       | 144 -146      | 1.98           | C. wuellerstorfi | 3        | 0.483 | 0.262 | not rejected          |
| 22759 A | LOMROG07-PC04 | -       | 2 -3          | 0.025          | N. pachyderma    | 10       | 0.085 | 0.036 | not rejected          |
| 22759 B | LOMROG07-PC04 | -       | 2 -3          | 0.025          | N. pachyderma    | 10       | 0.074 | 0.024 | 1                     |
| 22759 C | LOMROG07-PC04 | -       | 2 -3          | 0.025          | N. pachyderma    | 10       | 0.097 | 0.038 | not rejected          |
| 22759 D | LOMROG07-PC04 | -       | 2 -3          | 0.025          | N. pachyderma    | 10       | 0.080 | 0.034 | not rejected          |
| 22759 E | LOMROG07-PC04 | -       | 2 -3          | 0.025          | N. pachyderma    | 10       | 0.100 | 0.043 | not rejected          |
| 22759 F | LOMROG07-PC04 | -       | 2 -3          | 0.025          | N. pachyderma    | 10       | 0.090 | 0.036 | not rejected          |
| 22759 G | LOMROG07-PC04 | -       | 2 -3          | 0.025          | N. pachyderma    | 10       | 0.094 | 0.039 | not rejected          |
| 22759 H | LOMROG07-PC04 | -       | 2 -3          | 0.025          | N. pachyderma    | 10       | 0.078 | 0.034 | not rejected          |
| 22759 I | LOMROG07-PC04 | -       | 2 -3          | 0.025          | N. pachyderma    | 10       | 0.100 | 0.038 | not rejected          |
| 22759 J | LOMROG07-PC04 | -       | 2 -3          | 0.025          | N. pachyderma    | 10       | 0.134 | 0.066 | not rejected          |
| 22759 K | LOMROG07-PC04 | -       | 2 -3          | 0.025          | N. pachyderma    | 10       | 0.171 | 0.075 | 3                     |
| 22759 L | LOMROG07-PC04 | -       | 2 -3          | 0.025          | N. pachyderma    | 10       | 0.135 | 0.061 | not rejected          |
| 22759 M | LOMROG07-PC04 | -       | 2 -3          | 0.025          | N. pachyderma    | 10       | 0.161 | 0.078 | 3                     |
| 22759 N | LOMROG07-PC04 | -       | 2 -3          | 0.025          | N. pachyderma    | 10       | 0.152 | 0.067 | 3                     |
| 22759 O | LOMROG07-PC04 | -       | 2 -3          | 0.025          | N. pachyderma    | 12       | 0.109 | 0.054 | not rejected          |
| 22759 P | LOMROG07-PC04 | -       | 2 -3          | 0.025          | N. pachyderma    | 12       | 0.100 | 0.042 | not rejected          |
| 22759 Q | LOMROG07-PC04 | -       | 2 -3          | 0.025          | N. pachyderma    | 12       | 0.121 | 0.054 | not rejected          |
| 22760 A | LOMROG07-PC04 | -       | 22 -23        | 0.225          | N. pachyderma    | 12       | 0.272 | 0.124 | not rejected          |
| 22760 B | LOMROG07-PC04 | -       | 22 -23        | 0.225          | N. pachyderma    | 12       | 0.275 | 0.118 | not rejected          |
| 22760 C | LOMROG07-PC04 | -       | 22 -23        | 0.225          | N. pachyderma    | 12       | 0.273 | 0.125 | not rejected          |
| 22760 D | LOMROG07-PC04 | -       | 22 -23        | 0.225          | N. pachyderma    | 12       | 0.286 | 0.123 | not rejected          |
| 22760 E | LOMROG07-PC04 | -       | 22 -23        | 0.225          | N. pachyderma    | 12       | 0.266 | 0.110 | not rejected          |
| 22760 F | LOMROG07-PC04 | -       | 22 -23        | 0.225          | N. pachyderma    | 12       | 0.287 | 0.124 | not rejected          |
| 22760 G | LOMROG07-PC04 | -       | 22 -23        | 0.225          | N. pachyderma    | 12       | 0.269 | 0.112 | not rejected          |
| 22760 H | LOMROG07-PC04 | -       | 22 -23        | 0.225          | N. pachyderma    | 12       | 0.262 | 0.097 | 3                     |
| 22760 I | LOMROG07-PC04 | -       | 22 -23        | 0.225          | N. pachyderma    | 12       | 0.278 | 0.127 | not rejected          |
| 22760 J | LOMROG07-PC04 | -       | 22 -23        | 0.225          | N. pachyderma    | 12       | 0.287 | 0.142 | not rejected          |
| 22760 K | LOMROG07-PC04 | -       | 22 -23        | 0.225          | N. pachyderma    | 12       | 0.284 | 0.123 | not rejected          |
| 22761 A | LOMROG07-PC04 | -       | 102 -103      | 1.025          | N. pachyderma    | 7        | 0.347 | 0.172 | 3                     |
| 22761 B | LOMROG07-PC04 | -       | 102 -103      | 1.025          | N. pachyderma    | 10       | 0.313 | 0.145 | not rejected          |
| 22761 C | LOMROG07-PC04 | -       | 102 -103      | 1.025          | N. pachyderma    | 10       | 0.333 | 0.158 | not rejected          |
| 22761 D | LOMROG07-PC04 | -       | 102 -103      | 1.025          | N. pachyderma    | 10       | 0.316 | 0.157 | not rejected          |
| 22761 E | LOMROG07-PC04 | -       | 102 -103      | 1.025          | N. pachyderma    | 10       | 0.299 | 0.132 | not rejected          |
| 22761 F | LOMROG07-PC04 | -       | 102 -103      | 1.025          | N. pachyderma    | 10       | 0.307 | 0.145 | not rejected          |
| 22761 G | LOMROG07-PC04 | -       | 102 -103      | 1.025          | N. pachyderma    | 10       | 0.320 | 0.139 | not rejected          |
| 22761 H | LOMROG07-PC04 | -       | 102 -103      | 1.025          | N. pachyderma    | 10       | 0.336 | 0.169 | not rejected          |
| 22761 I | LOMROG07-PC04 | -       | 102 -103      | 1.025          | N. pachyderma    | 10       | 0.329 | 0.168 | not rejected          |
| 22761 J | LOMROG07-PC04 | -       | 102 -103      | 1.025          | N. pachyderma    | 10       | 0.316 | 0.149 | not rejected          |
| 22761 K | LOMROG07-PC04 | -       | 102 -103      | 1.025          | N. pachyderma    | 10       | 0.323 | 0.155 | not rejected          |
| 22761 L | LOMROG07-PC04 | -       | 102 -103      | 1.025          | N. pachyderma    | 10       | 0.278 | 0.110 | 3                     |
| 22761 M | LOMROG07-PC04 | -       | 102 -103      | 1.025          | N. pachyderma    | 10       | 0.325 | 0.147 | not rejected          |
| 22762 A | LOMROG07-PC04 | -       | 138 -139      | 1.385          | N. pachyderma    | 12       | 0.424 | 0.235 | not rejected          |
| 22762 B | LOMROG07-PC04 | -       | 138 -139      | 1.385          | N. pachyderma    | 12       | 0.421 | 0.238 | not rejected          |
| 22762 C | LOMROG07-PC04 | -       | 138 -139      | 1.385          | N. pachyderma    | 12       | 0.346 | 0.153 | not rejected          |
| 22762 D | LOMROG07-PC04 | -       | 138 -139      | 1.385          | N. pachyderma    | 12       | 0.395 | 0.206 | not rejected          |
| 22762 E | LOMROG07-PC04 | -       | 138 -139      | 1.385          | N. pachyderma    | 12       | 0.375 | 0.202 | not rejected          |
| 22762 F | LOMROG07-PC04 | -       | 138 -139      | 1.385          | N. pachyderma    | 12       | 0.273 | 0.153 | 1                     |
| 22762 G | LOMROG07-PC04 | -       | 138 -139      | 1.385          | N. pachyderma    | 12       | 0.381 | 0.198 | not rejected          |
| 22762 H | LOMROG07-PC04 | -       | 138 -139      | 1.385          | N. pachyderma    | 12       | 0.421 | 0.228 | not rejected          |
| 22762 I | LOMROG07-PC04 | -       | 138 -139      | 1.385          | N. pachyderma    | 12       | 0.343 | 0.142 | not rejected          |
| 22762 J | LOMROG07-PC04 | -       | 138 -139      | 1.385          | N. pachyderma    | 12       | 0.367 | 0.179 | not rejected          |
| 22762 K | LOMROG07-PC04 | -       | 138 -139      | 1.385          | N. pachyderma    | 12       | 0.305 | 0.121 | 3                     |
| 22762 L | LOMROG07-PC04 | -       | 138 -139      | 1.385          | N. pachyderma    | 12       | 0.408 | 0.190 | not rejected          |
| 22762 M | LOMROG07-PC04 | -       | 138 -139      | 1.385          | N. pachyderma    | 12       | 0.372 | 0.173 | not rejected          |
| 22763 A | LOMROG07-PC04 | -       | 178 -179      | 1.785          | N. pachyderma    | 12       | 0.277 | 0.102 | 3                     |



| UAL     | Core          | Section | Interval (cm) | Core depth (m) | Genus/sp.     | *n tests | DLAsp | DLGlu | **Rejection criterion |
|---------|---------------|---------|---------------|----------------|---------------|----------|-------|-------|-----------------------|
| 22763 B | LOMROG07-PC04 | -       | 178 - 179     | 1.785          | N. pachyderma | 12       | 0.390 | 0.197 | not rejected          |
| 22763 C | LOMROG07-PC04 | -       | 178 - 179     | 1.785          | N. pachyderma | 12       | 0.363 | 0.175 | not rejected          |
| 22763 D | LOMROG07-PC04 | -       | 178 - 179     | 1.785          | N. pachyderma | 12       | 0.378 | 0.184 | not rejected          |
| 22763 E | LOMROG07-PC04 | -       | 178 - 179     | 1.785          | N. pachyderma | 12       | 0.289 | 0.115 | 3                     |
| 22763 F | LOMROG07-PC04 | -       | 178 - 179     | 1.785          | N. pachyderma | 12       | 0.214 | 0.071 | 1                     |
| 22763 G | LOMROG07-PC04 | -       | 178 - 179     | 1.785          | N. pachyderma | 12       | 0.358 | 0.162 | not rejected          |
| 22763 H | LOMROG07-PC04 | -       | 178 - 179     | 1.785          | N. pachyderma | 12       | 0.426 | 0.236 | 3                     |
| 22763 I | LOMROG07-PC04 | -       | 178 - 179     | 1.785          | N. pachyderma | 12       | 0.403 | 0.190 | not rejected          |
| 22763 J | LOMROG07-PC04 | -       | 178 - 179     | 1.785          | N. pachyderma | 12       | 0.369 | 0.177 | not rejected          |
| 22763 K | LOMROG07-PC04 | -       | 178 - 179     | 1.785          | N. pachyderma | 12       | 0.415 | 0.203 | not rejected          |
| 22763 L | LOMROG07-PC04 | -       | 178 - 179     | 1.785          | N. pachyderma | 12       | 0.415 | 0.209 | not rejected          |
| 22764 A | LOMROG07-PC04 | -       | 202 - 203     | 2.025          | N. pachyderma | 14       | 0.480 | 0.277 | not rejected          |
| 22764 B | LOMROG07-PC04 | -       | 202 - 203     | 2.025          | N. pachyderma | 14       | 0.454 | 0.265 | not rejected          |
| 22764 C | LOMROG07-PC04 | -       | 202 - 203     | 2.025          | N. pachyderma | 14       | 0.471 | 0.289 | not rejected          |
| 22764 D | LOMROG07-PC04 | -       | 202 - 203     | 2.025          | N. pachyderma | 14       | 0.453 | 0.252 | not rejected          |
| 22764 E | LOMROG07-PC04 | -       | 202 - 203     | 2.025          | N. pachyderma | 13       | 0.409 | 0.251 | not rejected          |
| 22764 F | LOMROG07-PC04 | -       | 202 - 203     | 2.025          | N. pachyderma | 13       | 0.287 | 0.156 | 2                     |
| 22764 G | LOMROG07-PC04 | -       | 202 - 203     | 2.025          | N. pachyderma | 13       | 0.362 | 0.158 | not rejected          |
| 22764 H | LOMROG07-PC04 | -       | 202 - 203     | 2.025          | N. pachyderma | 13       | 0.228 | 0.074 | 2                     |
| 22764 I | LOMROG07-PC04 | -       | 202 - 203     | 2.025          | N. pachyderma | 10       | 0.291 | 0.114 | not rejected          |
| 22765 A | LOMROG12-PC09 | 2       | 26 - 28       | 0.8            | N. pachyderma | 10       | 0.379 | 0.203 | not rejected          |
| 22765 B | LOMROG12-PC09 | 2       | 26 - 28       | 0.8            | N. pachyderma | 10       | 0.360 | 0.176 | not rejected          |
| 22765 C | LOMROG12-PC09 | 2       | 26 - 28       | 0.8            | N. pachyderma | 10       | 0.398 | 0.198 | not rejected          |
| 22765 D | LOMROG12-PC09 | 2       | 26 - 28       | 0.8            | N. pachyderma | 10       | 0.370 | 0.194 | not rejected          |
| 22765 E | LOMROG12-PC09 | 2       | 26 - 28       | 0.8            | N. pachyderma | 10       | 0.384 | 0.200 | not rejected          |
| 22765 F | LOMROG12-PC09 | 2       | 26 - 28       | 0.8            | N. pachyderma | 10       | 0.359 | 0.181 | not rejected          |
| 22765 G | LOMROG12-PC09 | 2       | 26 - 28       | 0.8            | N. pachyderma | 10       | 0.390 | 0.209 | not rejected          |
| 22765 H | LOMROG12-PC09 | 2       | 26 - 28       | 0.8            | N. pachyderma | 10       | 0.381 | 0.205 | not rejected          |
| 22765 I | LOMROG12-PC09 | 2       | 26 - 28       | 0.8            | N. pachyderma | 10       | 0.386 | 0.204 | not rejected          |
| 22765 J | LOMROG12-PC09 | 2       | 26 - 28       | 0.8            | N. pachyderma | 10       | 0.367 | 0.188 | not rejected          |
| 22765 K | LOMROG12-PC09 | 2       | 26 - 28       | 0.8            | N. pachyderma | 10       | 0.371 | 0.190 | not rejected          |
| 22765 L | LOMROG12-PC09 | 2       | 26 - 28       | 0.8            | N. pachyderma | 10       | 0.362 | 0.169 | 3                     |
| 22765 M | LOMROG12-PC09 | 2       | 26 - 28       | 0.8            | N. pachyderma | 10       | 0.378 | 0.191 | not rejected          |
| 22765 N | LOMROG12-PC09 | 2       | 26 - 28       | 0.8            | N. pachyderma | 10       | 0.378 | 0.194 | not rejected          |
| 22765 O | LOMROG12-PC09 | 2       | 26 - 28       | 0.8            | N. pachyderma | 10       | 0.382 | 0.226 | 3                     |
| 22765 P | LOMROG12-PC09 | 2       | 26 - 28       | 0.8            | N. pachyderma | 10       | 0.400 | 0.212 | not rejected          |
| 22765 Q | LOMROG12-PC09 | 2       | 26 - 28       | 0.8            | N. pachyderma | 10       | 0.388 | 0.208 | not rejected          |
| 22766 A | LOMROG12-PC09 | 2       | 71 - 73       | 1.25           | N. pachyderma | 10       | 0.398 | 0.199 | not rejected          |
| 22766 B | LOMROG12-PC09 | 2       | 71 - 73       | 1.25           | N. pachyderma | 10       | 0.427 | 0.233 | not rejected          |
| 22766 C | LOMROG12-PC09 | 2       | 71 - 73       | 1.25           | N. pachyderma | 10       | 0.378 | 0.174 | not rejected          |
| 22766 D | LOMROG12-PC09 | 2       | 71 - 73       | 1.25           | N. pachyderma | 10       | 0.380 | 0.179 | not rejected          |
| 22766 E | LOMROG12-PC09 | 2       | 71 - 73       | 1.25           | N. pachyderma | 10       | 0.444 | 0.252 | not rejected          |
| 22766 F | LOMROG12-PC09 | 2       | 71 - 73       | 1.25           | N. pachyderma | 10       | 0.425 | 0.233 | not rejected          |
| 22766 G | LOMROG12-PC09 | 2       | 71 - 73       | 1.25           | N. pachyderma | 10       | 0.355 | 0.181 | not rejected          |
| 22766 H | LOMROG12-PC09 | 2       | 71 - 73       | 1.25           | N. pachyderma | 10       | 0.431 | 0.249 | not rejected          |
| 22766 I | LOMROG12-PC09 | 2       | 71 - 73       | 1.25           | N. pachyderma | 10       | 0.374 | 0.194 | not rejected          |
| 22766 J | LOMROG12-PC09 | 2       | 71 - 73       | 1.25           | N. pachyderma | 10       | 0.393 | 0.200 | not rejected          |
| 22767 A | LOMROG12-PC09 | 2       | 130 - 132     | 1.84           | N. pachyderma | 10       | 0.444 | 0.242 | not rejected          |
| 22767 B | LOMROG12-PC09 | 2       | 130 - 132     | 1.84           | N. pachyderma | 10       | 0.429 | 0.219 | not rejected          |
| 22767 C | LOMROG12-PC09 | 2       | 130 - 132     | 1.84           | N. pachyderma | 10       | 0.477 | 0.259 | 3                     |
| 22767 D | LOMROG12-PC09 | 2       | 130 - 132     | 1.84           | N. pachyderma | 10       | 0.315 | 0.160 | 3                     |
| 22767 E | LOMROG12-PC09 | 2       | 130 - 132     | 1.84           | N. pachyderma | 10       | 0.399 | 0.185 | not rejected          |
| 22767 F | LOMROG12-PC09 | 2       | 130 - 132     | 1.84           | N. pachyderma | 10       | 0.425 | 0.208 | not rejected          |
| 22767 G | LOMROG12-PC09 | 2       | 130 - 132     | 1.84           | N. pachyderma | 10       | 0.426 | 0.210 | not rejected          |
| 22767 H | LOMROG12-PC09 | 2       | 130 - 132     | 1.84           | N. pachyderma | 10       | 0.409 | 0.199 | not rejected          |
| 22767 I | LOMROG12-PC09 | 2       | 130 - 132     | 1.84           | N. pachyderma | 10       | 0.431 | 0.232 | not rejected          |
| 22767 J | LOMROG12-PC09 | 2       | 130 - 132     | 1.84           | N. pachyderma | 10       | 0.377 | 0.162 | not rejected          |
| 22767 K | LOMROG12-PC09 | 2       | 130 - 132     | 1.84           | N. pachyderma | 10       | 0.435 | 0.239 | not rejected          |
| 22767 L | LOMROG12-PC09 | 2       | 130 - 132     | 1.84           | N. pachyderma | 10       | 0.382 | 0.174 | not rejected          |
| 22768 A | LOMROG12-PC09 | 2       | 144 - 146     | 1.98           | N. pachyderma | 10       | 0.442 | 0.235 | not rejected          |
| 22768 B | LOMROG12-PC09 | 2       | 144 - 146     | 1.98           | N. pachyderma | 10       | 0.437 | 0.238 | not rejected          |
| 22768 C | LOMROG12-PC09 | 2       | 144 - 146     | 1.98           | N. pachyderma | 10       | 0.434 | 0.237 | not rejected          |
| 22768 D | LOMROG12-PC09 | 2       | 144 - 146     | 1.98           | N. pachyderma | 10       | 0.432 | 0.231 | not rejected          |
| 22768 E | LOMROG12-PC09 | 2       | 144 - 146     | 1.98           | N. pachyderma | 10       | 0.417 | 0.200 | not rejected          |
| 22768 F | LOMROG12-PC09 | 2       | 144 - 146     | 1.98           | N. pachyderma | 10       | 0.329 | 0.128 | 3                     |

| UAL                                                              | Core          | Section | Interval (cm) | Core depth (m) | Genus/sp.     | *n tests | DLAsp | DLGlu | **Rejection criterion |
|------------------------------------------------------------------|---------------|---------|---------------|----------------|---------------|----------|-------|-------|-----------------------|
| 22768 G                                                          | LOMROG12-PC09 | 2       | 144 -146      | 1.98           | N. pachyderma | 10       | 0.418 | 0.216 | not rejected          |
| 22768 H                                                          | LOMROG12-PC09 | 2       | 144 -146      | 1.98           | N. pachyderma | 10       | 0.452 | 0.252 | not rejected          |
| 22768 I                                                          | LOMROG12-PC09 | 2       | 144 -146      | 1.98           | N. pachyderma | 10       | 0.432 | 0.228 | not rejected          |
| 22768 J                                                          | LOMROG12-PC09 | 2       | 144 -146      | 1.98           | N. pachyderma | 10       | 0.440 | 0.232 | not rejected          |
| 22768 K                                                          | LOMROG12-PC09 | 2       | 144 -146      | 1.98           | N. pachyderma | 10       | 0.409 | 0.204 | not rejected          |
| 22768 L                                                          | LOMROG12-PC09 | 2       | 144 -146      | 1.98           | N. pachyderma | 10       | 0.399 | 0.188 | not rejected          |
| 22768 M                                                          | LOMROG12-PC09 | 2       | 144 -146      | 1.98           | N. pachyderma | 10       | 0.382 | 0.171 | 3                     |
| 22768 N                                                          | LOMROG12-PC09 | 2       | 144 -146      | 1.98           | N. pachyderma | 10       | 0.461 | 0.267 | not rejected          |
| 22768 O                                                          | LOMROG12-PC09 | 2       | 144 -146      | 1.98           | N. pachyderma | 10       | 0.488 | 0.272 | 3                     |
| 22768 P                                                          | LOMROG12-PC09 | 2       | 144 -146      | 1.98           | N. pachyderma | 10       | 0.466 | 0.265 | not rejected          |
| 22768 Q                                                          | LOMROG12-PC09 | 2       | 144 -146      | 1.98           | N. pachyderma | 10       | 0.452 | 0.251 | not rejected          |
| 22769 A                                                          | LOMROG12-PC09 | 3       | 12 - 14       | 2.16           | N. pachyderma | 10       | 0.440 | 0.259 | not rejected          |
| 22769 B                                                          | LOMROG12-PC09 | 3       | 12 - 14       | 2.16           | N. pachyderma | 10       | 0.499 | 0.296 | not rejected          |
| 22769 C                                                          | LOMROG12-PC09 | 3       | 12 - 14       | 2.16           | N. pachyderma | 10       | 0.507 | 0.310 | not rejected          |
| 22769 D                                                          | LOMROG12-PC09 | 3       | 12 - 14       | 2.16           | N. pachyderma | 10       | 0.380 | 0.224 | not rejected          |
| 22769 E                                                          | LOMROG12-PC09 | 3       | 12 - 14       | 2.16           | N. pachyderma | 10       | 0.526 | 0.328 | not rejected          |
| 22769 F                                                          | LOMROG12-PC09 | 3       | 12 - 14       | 2.16           | N. pachyderma | 10       | 0.508 | 0.305 | not rejected          |
| 22769 G                                                          | LOMROG12-PC09 | 3       | 12 - 14       | 2.16           | N. pachyderma | 10       | 0.427 | 0.211 | not rejected          |
| 22769 H                                                          | LOMROG12-PC09 | 3       | 12 - 14       | 2.16           | N. pachyderma | 10       | 0.523 | 0.323 | not rejected          |
| 22769 I                                                          | LOMROG12-PC09 | 3       | 12 - 14       | 2.16           | N. pachyderma | 10       | 0.494 | 0.282 | not rejected          |
| 22769 J                                                          | LOMROG12-PC09 | 3       | 12 - 14       | 2.16           | N. pachyderma | 10       | 0.547 | 0.310 | not rejected          |
| 22769 K                                                          | LOMROG12-PC09 | 3       | 12 - 14       | 2.16           | N. pachyderma | 10       | 0.420 | 0.241 | not rejected          |
| 22769 L                                                          | LOMROG12-PC09 | 3       | 12 - 14       | 2.16           | N. pachyderma | 10       | 0.430 | 0.248 | not rejected          |
| 22769 M                                                          | LOMROG12-PC09 | 3       | 12 - 14       | 2.16           | N. pachyderma | 10       | 0.357 | 0.142 | 1                     |
| 22770 A                                                          | LOMROG12-PC09 | 3       | 136 - 138     | 3.4            | N. pachyderma | 10       | 0.359 | 0.159 | 3                     |
| 22770 B                                                          | LOMROG12-PC09 | 3       | 136 - 138     | 3.4            | N. pachyderma | 10       | 0.402 | 0.203 | not rejected          |
| 22770 C                                                          | LOMROG12-PC09 | 3       | 136 - 138     | 3.4            | N. pachyderma | 10       | 0.353 | 0.185 | 3                     |
| 22770 D                                                          | LOMROG12-PC09 | 3       | 136 - 138     | 3.4            | N. pachyderma | 10       | 0.403 | 0.210 | not rejected          |
| 22770 E                                                          | LOMROG12-PC09 | 3       | 136 - 138     | 3.4            | N. pachyderma | 10       | 0.403 | 0.199 | not rejected          |
| 22770 F                                                          | LOMROG12-PC09 | 3       | 136 - 138     | 3.4            | N. pachyderma | 10       | 0.387 | 0.194 | 3                     |
| 22770 G                                                          | LOMROG12-PC09 | 3       | 136 - 138     | 3.4            | N. pachyderma | 10       | 0.415 | 0.205 | not rejected          |
| 22770 H                                                          | LOMROG12-PC09 | 3       | 136 - 138     | 3.4            | N. pachyderma | 10       | 0.403 | 0.196 | not rejected          |
| 22770 I                                                          | LOMROG12-PC09 | 3       | 136 - 138     | 3.4            | N. pachyderma | 10       | 0.455 | 0.223 | 3                     |
| 22770 J                                                          | LOMROG12-PC09 | 3       | 136 - 138     | 3.4            | N. pachyderma | 10       | 0.409 | 0.210 | not rejected          |
| 22770 K                                                          | LOMROG12-PC09 | 3       | 136 - 138     | 3.4            | N. pachyderma | 10       | 0.411 | 0.199 | not rejected          |
| *n tests = number of foraminifera tests comprising the subsample |               |         |               |                |               |          |       |       |                       |
| **Rejection criteria are:                                        |               |         |               |                |               |          |       |       |                       |
| 1) L-Ser/L-Asp > 0.8                                             |               |         |               |                |               |          |       |       |                       |
| 2) Asp or Glu D/L fall off the covariance trend                  |               |         |               |                |               |          |       |       |                       |
| 3) Asp or Glu D/L > ± 2 σ of group mean                          |               |         |               |                |               |          |       |       |                       |
